# Supplementary material for: Innovation on Wings: Nonstop Flights and Firm Innovation in the Global Context
Source: Atypon-hosted journal article supplement (doi:10.1287/mnsc.2023.4682), 2023-03-03
Supplement: mnsc.2023.4682.sm1.pdf [file mnsc.2023.4682.sm1.pdf]

Online Appendix  
for  
Innovation on Wings: Nonstop Flights and Global Innovation

Table of Contents

|                                                                         |           |
|-------------------------------------------------------------------------|-----------|
| <i>Appendix A. Counterfactual Patent Matching.....</i>                  | <b>3</b>  |
| A1. Research questions and identification challenges .....              | <b>3</b>  |
| A2. Text similarity matching method .....                               | <b>4</b>  |
| A3. Summary Statistics .....                                            | <b>6</b>  |
| A4. Counterfactual Citations.....                                       | <b>8</b>  |
| A5. Counterfactual Collaborations .....                                 | <b>11</b> |
| A6. Alternate Empirical Specifications .....                            | <b>14</b> |
| A7. Assumptions required for causal interpretation .....                | <b>17</b> |
| A8. Inferring economic significance of the counterfactual results ..... | <b>17</b> |
| <i>Appendix B. Regression Discontinuity.....</i>                        | <b>20</b> |
| B1. Regression Discontinuity Sample Summary .....                       | <b>20</b> |
| B2. First Stage Regressions .....                                       | <b>20</b> |
| B3. Varying the number of bins .....                                    | <b>23</b> |
| B4. Varying the bin selection method.....                               | <b>24</b> |
| B5. Varying kernel choice.....                                          | <b>27</b> |
| B6. Fixed Effects and Clustering .....                                  | <b>28</b> |
| B7. Higher order polynomials for the reduced form.....                  | <b>30</b> |
| B8. Placebo thresholds .....                                            | <b>31</b> |
| B9. Density of running variable .....                                   | <b>34</b> |
| B10. Cross-assignee results.....                                        | <b>35</b> |
| B12. Poisson regressions, Log+1 transformations and raw counts.....     | <b>38</b> |
| B13. Pooling airports at cities .....                                   | <b>41</b> |
| <i>Appendix C. Mass Variables.....</i>                                  | <b>42</b> |
| C1. List of hubs .....                                                  | <b>42</b> |
| C2. Probability of hubs across distances .....                          | <b>44</b> |
| C3. Innovation hubs and distance .....                                  | <b>45</b> |
| C4. Hub to hub vs non-hub to hub .....                                  | <b>47</b> |
| C5. Leaders and followers.....                                          | <b>48</b> |

*Appendix D. Distances*.....50

    D1. Temporal distance ..... 50

    D2. North-South analysis ..... 53

    D3. Nonlinear effects..... 54

    D4. Immigrant Employees..... 56

*Appendix E. Subgroup Analysis*..... 57

*Appendix F. Airport level analysis and General Equilibrium concerns*..... 60

## Appendix A. Counterfactual Patent Matching

### A1. Research questions and identification challenges

To test whether distance affects knowledge flows and whether knowledge is geographically localized, the typical way would be to carry out the following specification:

$$Citations_{ij} = \beta_0 + \beta_1 Distance_{ij} + \epsilon_{ij},$$

where  $i, j$  refer to two locations,  $Citations_{ij}$  counts the number of citations between locations  $i$  and  $j$ , and  $Distance_{ij}$  is the distance between those locations. If we see  $\beta_1 < 0$ , this would be consistent with localized knowledge spillovers.

A key omitted variable is technological similarity. For example, a relevant question to ask is are there more citations between inventors located in the Bay Area because of their geographic proximity to one another? Or is it because the Bay Area has a specific set of industries, and citations are more likely to occur within industries? Simply controlling for industry classification and comparing citation patterns within industries is also inadequate because technological similarity causes not only knowledge spillovers but agglomeration: inventors move to locations where they will be most productive. We cannot distinguish between the effects of technological similarity and proximity.

JTH 1993 suggest comparing patent-citation pairs that actually happen versus potential patent-citation pairs where a citation does not happen. Given a “focal” patent and a real “citing” patent that cites the focal patent, a “counterfactual” patent can be chosen such that it is similar to the real citing patent but does not actually cite the focal patent. There exists debate regarding how to accurately choose potential patent-citation pairs, but generally researchers control for counterfactual patents that have similar 1) application year and 2) patent classification. Along these lines, we aim to control for the underlying technological similarity by looking at how similar the keywords in the patent titles are. In section C.2, we describe the methodology for measuring technological similarity using text analysis.

## A2. Text similarity matching method

For each real citing patent, we collect a counterfactual patent that is similar to the real citing patent but does NOT cite the focal patent. We measure similarity based on the patents' titles. Intuitively, if patents contain similar words, they will have similar underlying technologies. Furthermore, if patents contain similar words that do not appear elsewhere (e.g., "socket connector"), they should be counted as more similar than two patents that share words that frequently occur elsewhere. Thus, we use weighted Jaccard similarity measure<sup>1</sup> with TF-IDF weights.

Because the text matching process is computationally intensive, we narrow down our sample of all patents between 2005 and 2015 to those that were published by the top 50 assignees with the most patents and their citing patents. For each citing patent in this subsample, we take three steps: 1) collect all patents that have the same application year but do not cite our focal patent (these are potential candidates for the counterfactual patent), 2) calculate similarity scores between the real citing patent and all the candidates, and 3) choose the patent that has the highest similarity score to be the counterfactual patent.

For example, Figure A1 shows a pair of patents, one of which actually cites a patent in our dataset (the focal patent), and another that is similar to that citing patent but does not cite any patents in our dataset. The two patent titles have similar keywords, such as "socket connector" or "fasten" which gave the pair high similarity scores. Also, the two patents have the same application year of 2011. However, the two patents have different locations: While the real citing patent's location is Shenzhen, mainland China, the counterfactual patent is in Taipei, Taiwan. The fact that one patent cites the focal patent but the other does not may be driven by the availability of nonstop flights. Specifically, the citation pattern may be driven by the possibility that there are nonstop flights between the focal patent's inventor location and the citing patent's inventor location, but not between the focal patent's inventor location and the counterfactual patent's inventor location. This is the relationship we aim to statistically test.

---

<sup>1</sup> We calculate  $s(\mathbf{X}, \mathbf{Y}) = \frac{\sum_{i=1}^M \min(X_i, Y_i)}{\sum_{i=1}^M \max(X_i, Y_i)}$  for vectors  $\mathbf{X}, \mathbf{Y}$ . The vectors represent the TF-IDF scores of the words contained in the documents. TF-IDF refers to Term Frequency-Inverse Document Frequency and is calculated by counting the number of times a word occurs in a document (term frequency), and dividing that number by the log of the fraction of documents that contain the word (inverse document frequency).

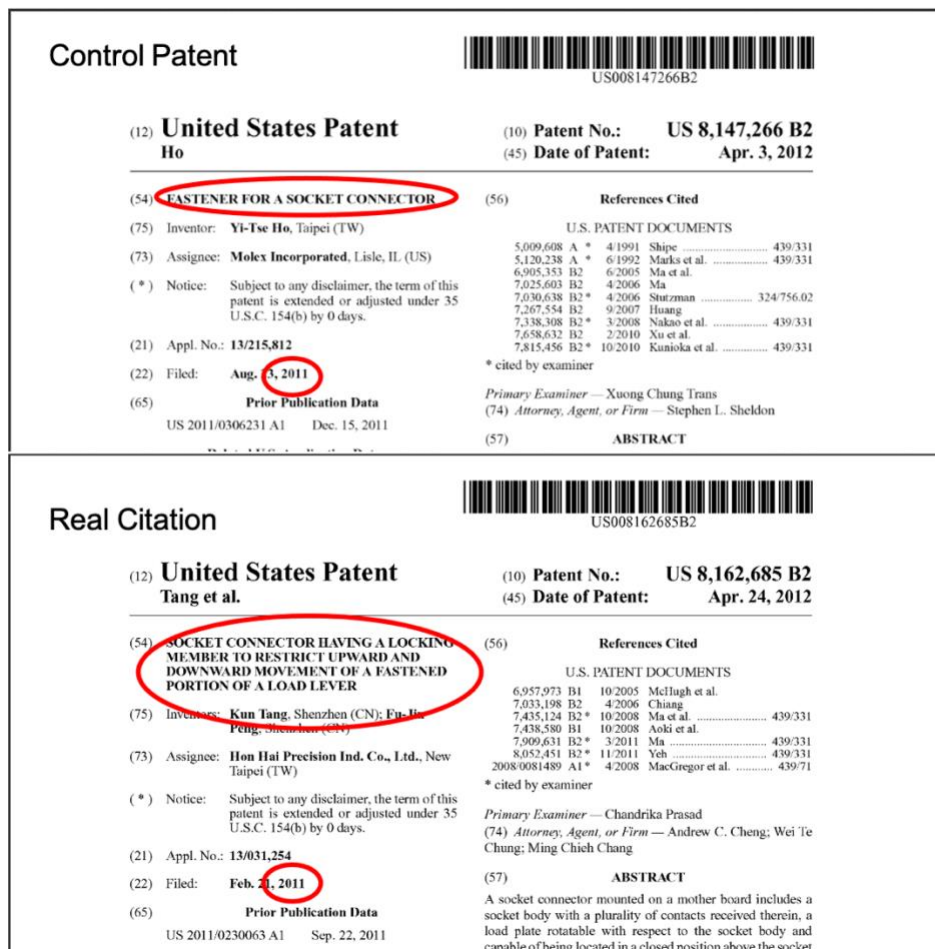

**Figure A1. Illustration of the matching method.**

This figure juxtaposes two patents: one real patent that cites the focal patent (not shown here) and a control/counterfactual patent that does not cite the focal patent. This pair of patents help illustrate how text similarity is calculated in our matching method.

When testing for inventors and collaborations between inventors, we utilize a similar approach. The assumption is that all inventors on the counterfactual patent and on the real citing patent are working on similar technologies and are thus likely to collaborate with one another (relative to inventors who work on dissimilar technologies). However, collaborations occur between certain inventors but not between others. We estimate the extent to which this pattern is driven by the availability of nonstop flights between these inventors.

### A3. Summary Statistics

In Table A1, we present summary statistics for the counterfactual patent matching data. Exactly half of the citations are real citations by construction. On average, 44.5% of patent-citation pairs are connected by a nonstop flight. Patent-citation pairs are separated by 3,635 miles, and on average have 2,453 of flights between them. Around 60% of the patent-citation pairs are located across country borders.

Similarly, for the counterfactual collaboration dataset, around 34.8% of inventor pairs are real collaborations. 53.2% of the inventors are connected by a nonstop flight, and are separated by 2,978 miles. On average, there are 3,550 flights between any two inventors, and 42.8% are located across country borders (i.e., are (potential) international collaborations). A more detailed breakdown is presented in Table A2.

**Table A1.** Summary statistics for the counterfactual patent matching data.

| Part A. Counterfactual Citations      |         |         |         |      |       |
|---------------------------------------|---------|---------|---------|------|-------|
|                                       | count   | mean    | s.d.    | min  | max   |
| Real Citations                        | 554884  | 0.50    | 0.50    | 0    | 1     |
| Nonstop                               | 554884  | 0.45    | 0.50    | 0    | 1     |
| Distance (asinh)                      | 554884  | 8.48    | 1.08    | 5.30 | 10.10 |
| Nonstop Flights (asinh)               | 554884  | 3.99    | 4.61    | 0    | 12.60 |
| Intl                                  | 554884  | 0.59    | 0.49    | 0    | 1     |
| Total Flights                         | 554884  | 2452.99 | 6099.44 | 0    | 74128 |
| Application Year                      | 554884  | 2011.75 | 2.27    | 2005 | 2016  |
| Part B. Counterfactual Collaborations |         |         |         |      |       |
|                                       | count   | mean    | s.d.    | min  | max   |
| Real Collaborations                   | 3350653 | 0.35    | 0.48    | 0    | 1     |
| Nonstop                               | 3350653 | 0.53    | 0.50    | 0    | 1     |
| Distance (asinh)                      | 3350653 | 8.17    | 1.17    | 5.30 | 10.10 |
| Nonstop Flights (asinh)               | 3350653 | 4.88    | 4.77    | 0    | 12.60 |
| Intl                                  | 3350653 | 0.43    | 0.49    | 0    | 1     |
| Total Flights                         | 3350653 | 3550.44 | 7748.24 | 0    | 74355 |
| Application Year                      | 3350653 | 2011.82 | 2.29    | 2005 | 2016  |

*Note:* Observations are at the patent-citation pair level for Part A and at the inventor pair level for Part B. Exactly half of the patent-citation pairs are real citations in Part A. Nonstop is an indicator for whether there exists a nonstop flight between a patent's location and the citation's location (Part A) or between the inventors' locations (Part B). Intl is an indicator for whether the patent-citation pairs are located in different countries (Part A) or whether the inventors are located in different countries (Part B). Distance is in miles. Application year is the application year for the citation.

**Table A2.** Summary statistics for the counterfactual patent matching data, by whether a nonstop flight exists between two locations.

| Part A-1: Counterfactual Citations, RealCitation=1 |        |         |          |         |           |
|----------------------------------------------------|--------|---------|----------|---------|-----------|
|                                                    | count  | mean    | s.d.     | min     | max       |
| Has Nonstop                                        | 277442 | 0.47    | 0.50     | 0.00    | 1.00      |
| Distance (asinh)                                   | 277442 | 8.42    | 1.09     | 5.30    | 10.09     |
| Nonstop Flights (asinh)                            | 277442 | 3.95    | 4.35     | 0.00    | 11.91     |
| Intl                                               | 277442 | 0.55    | 0.50     | 0.00    | 1.00      |
| Nonstop Flights                                    | 277442 | 5540.27 | 12916.75 | 0.00    | 148483.00 |
| Year                                               | 277442 | 2011.75 | 2.27     | 2005.00 | 2016.00   |

  

| Part A-2: Counterfactual Citations, RealCitation =0 |        |         |          |         |           |
|-----------------------------------------------------|--------|---------|----------|---------|-----------|
|                                                     | count  | mean    | s.d.     | min     | max       |
| Has Nonstop                                         | 277442 | 0.42    | 0.49     | 0.00    | 1.00      |
| Distance (asinh)                                    | 277442 | 8.53    | 1.07     | 5.30    | 10.10     |
| Nonstop Flights (asinh)                             | 277442 | 3.41    | 4.19     | 0.00    | 11.87     |
| Intl                                                | 277442 | 0.64    | 0.48     | 0.00    | 1.00      |
| Nonstop Flights                                     | 277442 | 4270.96 | 11400.96 | 0.00    | 142194.00 |
| Year                                                | 277442 | 2011.75 | 2.27     | 2005.00 | 2016.00   |

  

| Part B-1: Counterfactual Collaborations, RealCollaboration=1 |         |         |          |         |           |
|--------------------------------------------------------------|---------|---------|----------|---------|-----------|
|                                                              | count   | mean    | s.d.     | min     | max       |
| Has Nonstop                                                  | 1166671 | 0.61    | 0.49     | 0.00    | 1.00      |
| Distance (asinh)                                             | 1166671 | 7.79    | 1.23     | 5.30    | 10.07     |
| Nonstop Flights (asinh)                                      | 1166671 | 5.30    | 4.44     | 0.00    | 11.91     |
| Intl                                                         | 1166671 | 0.29    | 0.45     | 0.00    | 1.00      |
| Nonstop Flights                                              | 1166671 | 9128.62 | 17298.94 | 0.00    | 148483.00 |
| Year                                                         | 1166671 | 2011.76 | 2.33     | 2005.00 | 2016.00   |

  

| Part B-2: Counterfactual Collaborations, RealCollaboration=0 |         |         |          |         |           |
|--------------------------------------------------------------|---------|---------|----------|---------|-----------|
|                                                              | count   | mean    | s.d.     | min     | max       |
| Has Nonstop                                                  | 2183982 | 0.49    | 0.50     | 0.00    | 1.00      |
| Distance (asinh)                                             | 2183982 | 8.38    | 1.08     | 5.30    | 10.10     |
| Nonstop Flights (asinh)                                      | 2183982 | 4.09    | 4.37     | 0.00    | 11.91     |
| Intl                                                         | 2183982 | 0.50    | 0.50     | 0.00    | 1.00      |
| Nonstop Flights                                              | 2183982 | 6016.53 | 14320.50 | 0.00    | 148483.00 |
| Year                                                         | 2183982 | 2011.86 | 2.27     | 2005.00 | 2016.00   |

#### A4. Counterfactual Citations

To construct the citation dataset, for each focal patent, we identify a citing patent that cites the focal patent and a counterfactual non-citing patent. That is, for each citing patent, we have identified a counterfactual patent from the same application year that does not cite the focal patent but has a title with high textual similarity to the title of the citing patent. We determine the degree of textual similarity using an algorithm based on the Jaccard index of similarity, which counts the number of common words (“tokens”) in the two titles as a share of the total number of words (Niwattanakul et al. 2013).<sup>2</sup> More specialized words are weighted heavier than those that are common (for example, two patent titles that both contain the word “microprocessor” would be considered more similar than two titles that both contain the word “new”). We then study the effect of connectedness on patent citations using this set of matched counterfactual patents by creating a dataset in which each observation is a pair of patents. A patent pair contains either a focal patent and a real citing patent or a focal patent and a counterfactual patent matched to the citing patent, marked accordingly.

In the table below, we present summary statistics for the counterfactual patent-matching data. Exactly half of the patent-citation pairs are real citations by construction, with the other half consisting of counterfactual, non-citing patents. The dataset maps each patent pair (i.e., both patent-real citation pairs and patent-counterfactual citation pairs) to airport pairs to obtain information about the existence and the number of nonstop flights. On average, 45% of patent-citation pairs are connected by a nonstop flight (47% for real patent-citation pairs, 42% for counterfactual patent-citation pairs). The average patent-citation pair is separated by 3,635 miles in distance and has 2,453 flights per year (6.7 flights or around 3 round trips per day) between them.<sup>3</sup> Around 60% of the patent-citation pairs are located across national borders.

---

<sup>2</sup> Specifically, we calculate  $s(\mathbf{X}, \mathbf{Y}) = \frac{\sum_{i=1}^M \min(X_i, Y_i)}{\sum_{i=1}^M \max(X_i, Y_i)}$  for vectors  $\mathbf{X}, \mathbf{Y}$ . The vectors represent the TF-IDF scores of the words contained in the titles. TF-IDF refers to Term Frequency-Inverse Document Frequency and is calculated by counting the number of times a word occurs in a title (term frequency) and dividing that number by the log of the fraction of titles that contain the word (inverse document frequency).

<sup>3</sup> The average number of nonstop flights between patent-citation pairs is larger than the average number of flights between airport pairs (which is 631.44 nonstop flights per year) because patent-citation pairs are likely to be located at busier airport pairs that have many flights.

**Table A3.** Summary statistics for the control patent matching data.

| Part A. Counterfactual Citations |        |          |          |          |          |
|----------------------------------|--------|----------|----------|----------|----------|
|                                  | count  | mean     | sd       | min      | max      |
| realCitation                     | 554884 | .5       | .5000005 | 0        | 1        |
| Nonstop                          | 554884 | .4452696 | .496996  | 0        | 1        |
| Distance (asinh)                 | 554884 | 8.475401 | 1.081952 | 5.298575 | 10.10236 |
| Total Flights (asinh)            | 554884 | 3.99273  | 4.609691 | 0        | 12.60137 |
| Intl                             | 554884 | .5942503 | .491037  | 0        | 1        |
| Total Flights                    | 554884 | 2452.989 | 6099.436 | 0        | 74128    |
| Application Year                 | 554884 | 2011.751 | 2.270869 | 2005     | 2016     |

  

| Part B. Counterfactual Collaborations |         |          |          |          |          |
|---------------------------------------|---------|----------|----------|----------|----------|
|                                       | count   | mean     | sd       | min      | max      |
| realCollaboration                     | 3350653 | .3481921 | .4763974 | 0        | 1        |
| Nonstop                               | 3350653 | .5315071 | .4990064 | 0        | 1        |
| Distance (asinh)                      | 3350653 | 8.17056  | 1.168847 | 5.298498 | 10.10236 |
| Total Flights (asinh)                 | 3350653 | 4.882422 | 4.766773 | 0        | 12.60137 |
| Intl                                  | 3350653 | .427522  | .4947191 | 0        | 1        |
| Total Flights                         | 3350653 | 3550.44  | 7748.241 | 0        | 74355    |
| Application Year                      | 3350653 | 2011.821 | 2.294037 | 2005     | 2016     |

*Note:* Observations are at the patent-citation pair level for Part A, and at the inventor-pair level for Part B. Exactly half of patent-citation pairs are real citations in Part A. Nonstop is an indicator for whether there exists a nonstop flight between a patent’s location and the citation’s location (part A), or between the inventors’ locations (part B). Intl is an indicator for whether the patent-citation are located in different countries (part A) or whether inventors are located in different countries (part B). Distance is in miles. Application Year is the application year for the citation.

With this dataset, we explore the question of whether flight connectivity between two locations (as measured by the availability of nonstop flights) can explain patent citations between those locations. We estimate the following specification using ordinary least squares:<sup>4</sup>

$$\begin{aligned}
 & \textit{Real Citation}_{p,c,t} \\
 & = \delta_1 \textit{Has Nonstop}_{p,c,t} + \delta_2 \textit{Distance}_{p,c} + \omega_p + \gamma_c + \eta_t + \varepsilon_{p,c,t}
 \end{aligned} \tag{1}$$

for focal patent  $p$ , citation  $c$ , and application year  $t$ , where  $c$  can be a real citation or counterfactual citation.  $\textit{Real Citation}_{p,c,t} = 1$  if  $c$  actually cites patent  $p$  and  $= 0$  otherwise.  $\textit{Has Nonstop}_{p,c,t}$  is a binary variable for whether there exists a nonstop flight between the airports nearest to the locations of  $p, c$  in year  $t$ . Besides the binary variable for the existence of nonstop flights between the two locations underlying a patent-citation pair, we also use the count of nonstop flights between  $p$  and  $c$  as an alternative independent variable. We also control for  $\textit{Distance}_{p,c}$ , which is the geographic distance between the primary contributors (inventors whose names are listed first) who filed the citing patent  $p$  and the counterfactual, non-citing patent.<sup>5</sup> We include focal patent fixed

<sup>4</sup> We are estimating a linear probability model, which approximates the marginal effects without assuming an arbitrary nonlinear relationship (Angrist and Pischke 2008). Furthermore, OLS allows us to calculate the correct cluster robust standard errors.

<sup>5</sup> Distance, similarly to other variables with long-tailed distributions, is rescaled using the inverse hyperbolic sine (asinh). The inverse hyperbolic sine approximates the natural logarithm while retaining zero-valued observations (MacKinnon and Magee 1990).

effects ( $\omega_p$ ) to control for unobserved characteristics associated with the focal patent. To control for geopolitical unobservables, we include country fixed effects for the countries in which the citing and counterfactual patents are located ( $\gamma_c$ ), omitting focal patent country fixed effects since we already include focal patent fixed effects. Finally, we control for any year-specific shocks that may affect the relationship between nonstop flight existence and citations by including year fixed effects ( $\eta_t$ ). Table A4 presents the estimates for this specification.

**Table A4.** Effect of the existence of a nonstop flight on the likelihood of patent citation.

| Dep. Var.: Real citation (binary)     | (1)                    | (2)                    | (3)                    | (4)                    |
|---------------------------------------|------------------------|------------------------|------------------------|------------------------|
| Has nonstop                           | 0.0564<br>(0.004) ***  |                        | 0.0395<br>(0.006) ***  |                        |
| Nonstop flights (asinh)               |                        | 0.0080<br>(0.000) ***  |                        | 0.0073<br>(0.001) ***  |
| Has nonstop $\times$ Intl             |                        |                        | 0.0258<br>(0.008) ***  |                        |
| Nonstop flights (asinh) $\times$ Intl |                        |                        |                        | 0.0010<br>(0.001)      |
| Distance (asinh)                      | -0.0251<br>(0.002) *** | -0.0196<br>(0.002) *** | -0.0139<br>(0.003) *** | -0.0091<br>(0.003) *** |
| Intl                                  |                        |                        | -0.0636<br>(0.010) *** | -0.0521<br>(0.010) *** |
| N                                     | 554,864                | 554,864                | 554,864                | 554,864                |
| R <sup>2</sup>                        | 0.064                  | 0.065                  | 0.065                  | 0.065                  |

*Note:* This table estimates the change in the likelihood of a patent citation given the existence of a nonstop flight between airports near the inventors. It also estimates the effect of an alternative independent variable (number of nonstop flights) on citations. All specifications include a cited patent fixed effect, a citing/counterfactual patent's country fixed effect, and a year fixed effect. Standard errors are clustered at the cited patent level.

\*  $p < 0.05$ , \*\*  $p < 0.01$ , \*\*\*  $p < 0.001$ .

The results in Column 1 suggest that the existence of nonstop flights between two inventors who have patented similar technologies is associated with a 5.6 percentage point increase in the likelihood of a real citation, which represents an 11% increase in the likelihood of a real citation compared to the baseline citation likelihood of 50%. This estimate is obtained after controlling for the distance between the inventors and the characteristics of both countries of the inventors (in case they are different), as well as year fixed effects. To delve beyond the existence of nonstop flights between inventors, Column 2 of the same table uses an alternative independent variable—the number of flights between inventors. The result suggests that a 10% increase in the number of flights between two locations is associated with an increase of 0.08 percentage points in the likelihood of a patent citation. In terms of economic significance, given it is a continuous variable, we look in terms of standard deviations. In this case, a 1 standard deviation increase in flights corresponds to a 2 percentage point increase in the likelihood of a patent citation (or a 4% increase compared to the baseline).

Columns 3 and 4 allow for differential effects on whether a citation occurs across national borders by interacting the binary nonstop flight existence variable with a binary variable that equals one if  $p$  and  $c$  belong to inventors in different countries and equals zero otherwise. Our results suggest that the existence of nonstop flights is associated with an increase in the likelihood of citation, and this relation is, in part, driven when patents that are in different countries. When a nonstop flight exists across national borders relative to when there are no nonstop flights, the interaction term in Column 3 shows the likelihood of a citation increases by an additional 2.6 percentage points (a 5.2% increase based on the baseline citation likelihood). However, Column 4 shows that a 10% increase in the number of flights across international borders increases the likelihood of a citation by 0.01 percentage points, and the effect is not statistically significant. This result suggests that the existence of nonstop flights between two international locations is important for cross-country patent citations, but we are unable to find a distinguishable result for this continuous variable. In other words, the result suggests that the extensive margin is perhaps more important than the intensive margin in terms of flight connectivity. Thus far, our results suggest that connectedness between locations explains citations between patents, and this relationship holds when crossing national borders.

## A5. Counterfactual Collaborations

We also employed a textual similarity-based counterfactual patent method to study how nonstop flights affect patent collaborations. To measure inventor collaborations, we replicate the idea above and create a dataset in which each observation is a pair of inventors. Given a focal patent, we identify all inventors who worked on both a real citing patent and its matched counterfactual, non-citing patent. For this exercise, we use two sets of patents: all citing patents used for analysis in Section 3.1 and all counterfactual citations used for analysis in Section 3.1. Since these two sets of matched patents are highly similar (as measured by textual similarity of patent abstracts) in content, the inventors on these patents are arguably potential collaborators whose work centers around similar technologies. We then create all pairwise combinations of inventors from those two sets of patents. We mark a pair of inventors as a real collaboration if the two inventors actually worked together and otherwise if it is a counterfactual pair. For both pairs of inventors (i.e., real collaborations and counterfactual collaborations), we impute the relevant airport pairs. Then, we compare the existence of nonstop flights between real collaborators against that between potential collaborators who were not collaborating. For this counterfactual collaboration dataset, 34% of inventor pairs are real collaborations.<sup>6</sup> Fifty-three percent of the inventor pairs are connected by a nonstop flight (61% for real inventor pairs, 49% for counterfactual inventor pairs) and are separated by 2,978 miles on average. Also, on average, there are 3,550 flights between an inventor pair, and 43% of the inventor pairs are located across national borders (i.e., are potential global collaborations).

Specifically, to study global collaborations, we estimate a slightly different specification from the citations regression:

$$\begin{aligned} \textit{Real Collaboration}_{p,i,j,t} & \\ &= \beta_1 \textit{Has Nonstop}_{i,j,t} + \beta_2 \textit{Distance}_{i,j} + \omega_p + \eta_t + \varepsilon_{p,c,t} \end{aligned} \quad (2)$$

Again,  $p$  stands for the focal patent,  $i, j$  stand for inventors, and  $t$  stands for the year of collaboration. The value of  $\textit{Real Collaboration}_{p,i,j,t} = 1$  if inventors  $i, j$  are actual collaborators

---

<sup>6</sup> In contrast to citations, the collaborations dataset is not split evenly because real and counterfactual collaborations do not contain even numbers of inventors.

on a citing or counterfactual citing patent of focal patent  $p$  issued in year  $t$  and  $= 0$  otherwise.  $Has\ Nonstop_{i,j,t}$  is an indicator for whether a nonstop flight connects the two inventors in year  $t$ , and  $Distance_{i,j}$  is the inverse hyperbolic sine of the distance between the inventors. We include focal patent fixed effects  $\omega_p$  to control for the underlying technology and year fixed effects  $\eta_t$  to capture any time-specific effects.

**Table A5.** Effect of the existence of a nonstop flight on the likelihood of patent collaboration.

| Dep. Var.: Real collaboration (binary) | (1)                   | (2)                   | (3)                   | (4)                   |
|----------------------------------------|-----------------------|-----------------------|-----------------------|-----------------------|
| Has nonstop                            | 0.0546<br>(0.002)***  |                       | 0.0187<br>(0.003)***  |                       |
| Nonstop flights (asinh)                |                       | 0.0069<br>(0.000)***  |                       | 0.0033<br>(0.000)***  |
| Has nonstop $\times$ Intl              |                       |                       | 0.0290<br>(0.004)***  |                       |
| Nonstop flights (asinh) $\times$ Intl  |                       |                       |                       | 0.0033<br>(0.000)***  |
| Distance (asinh)                       | -0.1580<br>(0.001)*** | -0.1549<br>(0.001)*** | -0.0761<br>(0.002)*** | -0.0740<br>(0.002)*** |
| Intl                                   |                       |                       | -0.3988<br>(0.005)*** | -0.3960<br>(0.005)*** |
| N                                      | 3,350,645             | 3,350,645             | 3,350,645             | 3,350,645             |
| R <sup>2</sup>                         | 0.255                 | 0.255                 | 0.273                 | 0.273                 |

*Note:* This table estimates the change in the likelihood of a collaboration given the existence of a nonstop flight between airports near the inventors. It also estimates the effect of an alternative independent variable (number of nonstop flights) on citations. All specifications include a cited patent fixed effect, a citing/counterfactual patent's country fixed effect, and a year fixed effect. Standard errors clustered at the cited patent level.

\*  $p < 0.05$ , \*\*  $p < 0.01$ , \*\*\*  $p < 0.001$ .

Table A5 shows the results of estimating Appendix Equation (2). Columns 1 and 2 show that inventors connected by at least one nonstop flight between their locations are 5.5 percentage points more likely to be collaborators, which is a 16% increase based on the baseline collaboration likelihood of 34%, as compared to inventors without nonstop connections between their locations. Column 2 of the same table again uses the number of flights between inventors. The result suggests that a 10% increase in the number of flights between two locations is associated with an increase of 0.07 percentage points in the likelihood of a collaboration. In terms of economic significance, we find that a 1 standard deviation increase in flights corresponds to a 1.7 percentage point increase in the likelihood of a collaboration (or a 5.1% increase compared to the baseline collaboration likelihood of 34%).

Columns 3 and 4 present the results from interacting the flight variables in Equation (2) with a binary variable for whether the inventors are located in different countries. The positive and significant coefficient shows that for global inventor teams, there is an additional 2.9 percentage point increase (an additional 8.3% increase from the baseline collaboration probability of 34%) in

the positive effect of the existence of nonstop flights on collaborations. In contrast to citations, the effect for international collaborations is significant for both independent variables—that is, whether or not two locations are connected by a nonstop flight and number of nonstop flights between the two locations. This result suggests that both the existence and the quantity/frequency of nonstop flights are important for driving collaborations between two locations.

## A6. Alternate Empirical Specifications

Using the counterfactual patent information collected above, we test how nonstop flights correlate with the probability of a patent pair having a nonstop flight. If nonstop flights increase the likelihood of citations, we should see a positive relationship between the given patent pair is a real citing patent pair, and whether the two locations have a nonstop flight.

Our regression specification is as follows:

$$\begin{aligned}
 \textit{Real Citation}_{p,c,t} & \\
 &= \delta_1 \textit{Nonstop Flights}_{p,c,t} + \delta_2 \textit{Distance}_{p,c} + \delta_3 \textit{Intl}_{p,c} \\
 &+ \delta_4 \textit{Intl}_{p,c} \times \textit{Nonstop Flights}_{p,c,t} + \omega_p + \gamma_c + \eta_t + \varepsilon_{p,c,t}
 \end{aligned} \tag{3}$$

for focal patent  $p$  and citation  $c$ , and application year  $t$  where  $c$  can correspond to a real citation or counterfactual citation.  $\textit{Real Citation}_{p,c,t} = 1$  if  $c$  actually cites patent  $p$ , and 0 otherwise.  $\textit{Nonstop Flights}_{p,c,t}$  counts the number of nonstop flights between the airports nearest to the locations of  $p, c$  in year  $t$ . We include focal patent fixed effects ( $\omega_p$ ) so that  $\delta_1$  measures the relationship between nonstop flights and real citations, keeping all the focal patent characteristics fixed. The variation in the number of nonstop flights comes from comparing the real citations and counterfactual citations. In some specifications, we include dummy variables for whether the flight is an international flight  $\textit{Intl}_{p,c}$ , and an interaction term between international flights and the number of nonstop flights. To the extent that nonstop flights affect international knowledge flows, we should see  $\delta_4 \neq 0$ . To control for geopolitical unobservables, we include country fixed effects for the counterfactual patent ( $\gamma_c$ ). Finally, we control for any year specific shocks that may affect the relationship between nonstop flights and citations ( $\eta_t$ ).

While in our preferred specification, we include distance between airports as a control, we address concerns of potential multicollinearity between the number of nonstop flights and distance. We first show that while there is a negative correlation between distance and the number of flights ( $\rho = -0.4481$ ), nonparametric kernel estimates in Figure A2 suggest the relationship is nonlinear. For very short distances between two locations, the likelihood of having a nonstop flight between those locations is around 0.6. The likelihood of having a nonstop flight increases to 0.8 as airports become more distant. However, for longer flights, the probability of nonstop flights decreases.

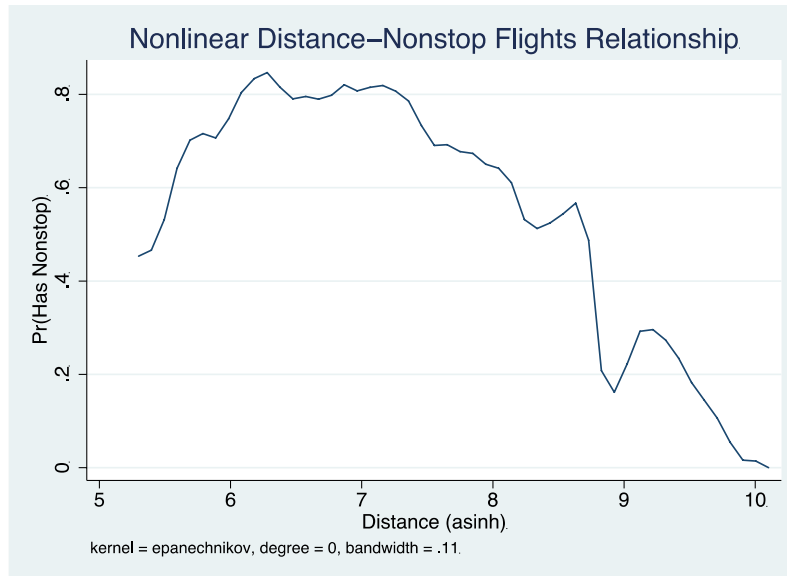

**Figure A2. Local polynomial regression of nonstop flights on distance**

Kernel-weighted local polynomial regression of nonstop flights on distance. Dataset uses all patent-citation pairs. Nonstop flights is a binary variable, denoting probability of any nonstop flights between a patent-citation pair. Distance between two airports is inverse hyperbolic sine transformed. Graph was created using the `lpoly` command in Stata.

We also estimate the specification above with and without distance controls, and compare the coefficients. Including controls for distance has little impact on our coefficient of interest  $\delta_4$  (the effect of nonstop flights on overcoming political borders) for citations, and a slight negative effect on collaborations. Overall, the results on reducing frictions from national borders hold even if we omit distance controls.

**Table A6.** Coefficients from the main specification results, with and without distance controls.

|             | Citations            |                      | Collaborations        |                       |
|-------------|----------------------|----------------------|-----------------------|-----------------------|
| Coefficient | With Distance        | Omit Distance        | With Distance         | Omit Distance         |
| $\delta_1$  | 0.0395***<br>(0.006) | 0.0452***<br>(0.006) | 0.0187***<br>(0.003)  | 0.0399***<br>(0.003)  |
| $\delta_3$  | -0.0636**<br>(0.010) | -0.0926**<br>(0.007) | -0.3988***<br>(0.005) | -0.5692***<br>(0.004) |
| $\delta_4$  | 0.0258***<br>(0.008) | 0.0257***<br>(0.008) | 0.0290***<br>(0.004)  | 0.0358***<br>(0.004)  |

*Note:* Standard errors in parentheses are clustered at the focal patent level. The coefficients in this table correspond to the same coefficients in Appendix Equation (3), which is the main specification in the paper.

Our standard errors are clustered at the focal patent level. Recent work shows that clustering is necessary when the sampling process and the assignment mechanism are clustered. In our context, this would correspond to how citations occur, and how counterfactual patents are assigned. Abadie et al. (2017) suggest researchers should cluster at the level of “treatment” assignment, hence our focal patent level clustered standard errors. If we believe instead that the assignment of counterfactual patents is completely random, we would not have a need for clustering; however, treatment is indeed

not random, and assigned at the focal patent level. Alternatively, coarser levels of clustering (i.e., country-country level) would be appropriate if we have reason to believe non-random sampling of some countries. Again, however, our dataset comprises of all nonstop flights across the globe, diminishing concerns of such non-random sampling.

## A7. Assumptions required for causal interpretation

Note that to interpret  $\beta$  as a causal effect, we would need to assume that  $cov(Has\ Nonstop_{p,c,t}, \varepsilon_{p,c,t}) = 0$ . This is a plausible assumption when thinking of the individual inventors: the existence of a nonstop flight between locations could be considered exogenous to patenting activities and citations. Of course, an important threat to our identification is whether the inventors relocate to places that have nonstop flights to locations with other inventors who they could collaborate with or cite. While this approach does not address some sources of endogeneity (e.g., we cannot distinguish between cases where the inventors involved in a particular citation or collaboration were in those locations before the existence of a flight), our regression discontinuity results are consistent with a causal interpretation.

## A8. Inferring economic significance of the counterfactual results

The counterfactual analysis suggests adding 7,352 nonstop routes per year will increase citations by 6.26% and adding 6,670 routes will increase collaborations by 7.49%. Roughly, increasing the number of nonstop routes by 30.59% will increase citations by 0.24 per patent – also adding a nonstop route leads to 2.36 more citations between those airports. Similarly, increasing the number of nonstop routes by 43.14% will add 0.29 more inventors per patent.

From Tables A4 & A5, we see that the existence of nonstop flights increases the likelihood of a citation increases by 5.64 percentage points, and collaborations by 5.46 percentage points. The baseline likelihood of a citation is 50%, and thus a 5.64 percentage point increase would be a 11.2% increase. Similarly, the baseline likelihood of a collaboration is 34.82%, and thus a 5.46 percentage point increase would be a 15.68% increase in the likelihood of a collaboration. Taken together with the interaction terms for international pairs, this would be 8.22 percentage points for citations and 8.36 percentage points for collaborations. Thus, in percentage increases, this would be a 16.44% increase in citations, and 24.01% increase in collaborations.

To calculate standard deviation changes, a one standard deviation increase in nonstop flights is 6099.44, and compared to the mean 2452.99, this is a 248.6532% increase. Thus, that would be a 1.98923 percentage point increase in citations,

Interpreting the economic magnitude of these changes requires us to make assumptions about how many nonstop flights are added, which we detail below.

Table A4 shows that when estimating  $Real\ Citation_{ij} = \beta_1 Has\ Nonstop_{ij}$  the coefficient is 0.0564. In conditional expectation form, we see  $E[Real\ Citation_{ij} | Has\ Nonstop_{ij} = 1] - E[Real\ Citation_{ij} | Has\ Nonstop_{ij} = 0] = 0.0564$ . This suggests the following interpretation: patent pairs  $ij$  with a nonstop flight are 5.64 percentage points more likely to be a real citation than patent pairs  $i'j'$  without nonstop flights. Assuming this is causal, the implication is that for any patent pair  $ij$  that does *not* have a nonstop flight, adding a nonstop flight will make it 5.64 percentage points more likely to be a real citation. We will maintain this causal interpretation and calculate the increase in patenting when “adding” a nonstop flight between patent pairs.

Here, we calculate the magnitude of a 5.64 percentage point increase in patent citations. There are 554,884 patent pairs in our data, half of which are real. Alternatively, 247,073 patent pairs have nonstop flights, while 307,811 do not (See Table A3 below for a cross tabulation). The baseline probability of a real citation, given no nonstop flight, is  $146,122 / 307,811 = 0.48$ . If nonstop flights were added to all patent-citation pairs, this baseline probability would increase by 5.64 percentage points to 0.53. Then, instead of 146,122 real citations, we would see 163,482.54 citations, an increase

of 17,360.54 patents.<sup>7</sup> There are 72,509 unique publications in our counterfactual patent dataset, which is 3.83 citations per patent.<sup>8</sup> An increase of 17,360.54 patents is an increase of 0.24 citations per patent, which is a 6.26% increase in citations per patent.

**Table A7.** Cross tabulation of citations for patent pairs with and without nonstop flights.

|             | Counterfactual Citations | Real Citations | Total   | Fraction Real Citations | Real citations if all routes have nonstop |
|-------------|--------------------------|----------------|---------|-------------------------|-------------------------------------------|
| No Nonstop  | 161,689                  | 146,122        | 307,811 | 0.4747                  | 163,482                                   |
| Has Nonstop | 115,753                  | 131,320        | 247,073 | 0.5315                  | 131,320                                   |
| Total       | 277,442                  | 277,442        | 554,884 | 0.5                     | 294,802                                   |

We next calculate the magnitude of this increase in light of the number of nonstop flights. Adding a nonstop flight for all patent-citation pairs without nonstop flights (i.e., for 307,811 patent-citation pairs) is not equivalent to adding 307,811 routes because multiple patent-citation pairs exist for each route. A rough estimate would be to go to the route-level citations data and add nonstop flights to all routes with any number of citations between them.<sup>9</sup> There are 48,898 routes across 11 years for a total of 537,878 route-year observations. Of these, 176,704 route-years have citations, and of those, 80,871 route years have citations but no nonstop flights. To ensure all routes with citations have nonstop flights, we would need to add nonstop flights to 80,871 route-years, for about 7,351.90 routes per year. On average, 24,035.45 routes per year have nonstop flights, and thus 7,351.90 is a 30.59% increase in routes with nonstop flights.

**Table A8.** Tabulation of the number of route-years with and without citations and collaborations, divided by whether a route-year has nonstop flights.

|             | No citations | Has citations | No collaborations | Yes collaborations |
|-------------|--------------|---------------|-------------------|--------------------|
| No Nonstop  | 192,617      | 80,871        | 200,114           | 73,374             |
| Has Nonstop | 168,557      | 95,833        | 167,682           | 96,708             |
|             | 361,174      | 176,704       | 376,796           | 170,082            |

The two tables above show that a 30.59% increase in nonstop flight routes will lead to a 6.26 percent increase in citations, or 0.24 citations per patent, per year. Alternatively, since adding 7,352 nonstop routes leads to an increase of 17,360 patents, we expect each new nonstop route to add 2.36 citations between those locations in a given year.

Finally, we repeat the exercise for collaborations. Again, Table A5 shows collaborations are 5.46 percentage points more likely if there exist nonstop flights. There are 3,350,653 potential inventor-pairs in our dataset, 1,166,671 of which are realized collaborations. If we add nonstop flights for all inventor pairs who don't have collaborations, we would see real collaborations increase

<sup>7</sup>  $((146,122/307,811)+0.0564)*307,811 = 163,482$

<sup>8</sup>  $277,447/72,509 = 3.8263$

<sup>9</sup> Since the results from the counterfactual analysis are derived from routes with patent-citation pairs, we take a conservative estimate and assume the impact may not carry over to routes without any patent-citation pairs.

from 454,515 to 540,223.73,<sup>10</sup> or by 85,708.73. This is 85,708.73 more collaborations, and an increase from 3.92 to 4.30 inventors on a patent, or about 0.29 inventors per patent.

**Table A9.** Cross tabulation of counterfactual versus real collaborations.

|             | Counterfactual collaboration | Real Collaboration | Total     | Fraction Real | # Real if nonstop |
|-------------|------------------------------|--------------------|-----------|---------------|-------------------|
| No Nonstop  | 1,115,242                    | 454,515            | 1,569,757 | 0.2895        | 540,224           |
| Has Nonstop | 1,068,740                    | 712,156            | 1,780,896 | 0.3999        | 712,156           |
| Total       | 2,183,982                    | 1,166,671          | 3,350,653 | 0.3482        | 1,252,380         |

Calculating the number of flights we would need to add, we see that there are 73,374 route-years (6,670.36 routes per year) with no nonstop flights but some level of collaborations. Thus, adding 6,670.36 routes per year, which is a 43.14% increase in the number of routes will increase the average number of collaborators per patent by 0.29, or about 7.49%.

---

<sup>10</sup> The calculation is as follows:  $((454,515/1,569,757)+0.0546)*1,569,757 = 540,223.732$ .

## Appendix B. Regression Discontinuity

### B1. Regression Discontinuity Sample Summary

**Table B1.** Summary statistics for the regression discontinuity sample.

|                                       | Count   | Mean     | Sd       | Min    | Max       |
|---------------------------------------|---------|----------|----------|--------|-----------|
| # Citations                           | 538,054 | 2.14     | 36.67    | 0.00   | 5,702.40  |
| # Collaborations                      | 538,054 | 2.00     | 56.47    | 0.00   | 7,228.03  |
| # Citations (firms)                   | 538,054 | 1.96     | 35.20    | 0.00   | 5,498.18  |
| # Collaborations (firms)              | 538,054 | 1.90     | 55.07    | 0.00   | 7,048.09  |
| # Citations (academic)                | 538,054 | 0.04     | 0.49     | 0.00   | 67.16     |
| # Collaborations (academic)           | 538,054 | 0.07     | 1.41     | 0.00   | 239.69    |
| # Citations (high inventor mass)      | 538,054 | 1.76     | 33.21    | 0.00   | 5,159.64  |
| # Collaborations (high inventor mass) | 538,054 | 1.87     | 54.54    | 0.00   | 6,945.35  |
| # Citations (low inventor mass)       | 538,054 | 0.23     | 2.68     | 0.00   | 394.66    |
| # Collaborations (low inventor mass)  | 538,054 | 0.10     | 1.73     | 0.00   | 200.72    |
| # Citations (high R&D)                | 538,054 | 0.28     | 7.04     | 0.00   | 1,168.81  |
| # Collaborations (high R&D)           | 538,054 | 0.37     | 12.79    | 0.00   | 2,028.88  |
| # Citations (low R&D)                 | 538,054 | 0.50     | 13.38    | 0.00   | 2,236.98  |
| # Collaborations (low R&D)            | 538,054 | 0.38     | 15.61    | 0.00   | 2,389.79  |
| # Citations (multi-ethnic)            | 538,054 | 1.53     | 24.00    | 0.00   | 3,733.47  |
| # Collaborations (multi-ethnic)       | 538,054 | 1.47     | 41.30    | 0.00   | 5,526.10  |
| # Citations (co-ethnic)               | 538,054 | 0.61     | 13.08    | 0.00   | 1,968.93  |
| # Collaborations (co-ethnic)          | 538,054 | 0.53     | 15.86    | 0.00   | 2,085.88  |
| Has nonstop                           | 538,054 | 0.49     | 0.50     | 0.00   | 1.00      |
| Total # of nonstop flights            | 538,054 | 611.95   | 1,799.85 | 0.00   | 74,002.00 |
| Distance (miles)                      | 521,477 | 1,110.86 | 1,246.99 | 0.00   | 11,873.40 |
| Hub-to-Hub flight                     | 537,878 | 0.26     | 0.44     | 0.00   | 1.00      |
| Working hour overlap                  | 537,878 | 7.04     | 1.58     | 0.00   | 8.00      |
| Immigrant friendliness distance       | 402,523 | 0.19     | 0.28     | 0.00   | 1.87      |
| Average price                         | 20,350  | 946.48   | 528.11   | 214.30 | 4,538.75  |
| Average duration (hours)              | 20,350  | 13.72    | 4.65     | 4.48   | 41.50     |

Note: This table provides the summary statistics for the regression discontinuity sample, which includes location pairs that are just above and below the 6000-mile threshold in terms of flight distance.

**Table B2.** Subsample correlations

|                                | N     | (1)    | (2)    | (3)    | (4)    | (5)    | (6)    | (7)   | (8)   |
|--------------------------------|-------|--------|--------|--------|--------|--------|--------|-------|-------|
| (1) Hub-to-Hub                 | 3,795 | 1.000  |        |        |        |        |        |       |       |
| (2) Leader-Leader              | 3,795 | 0.305  | 1.000  |        |        |        |        |       |       |
| (3) Follower-Follower          | 3,795 | -0.010 | -0.211 | 1.000  |        |        |        |       |       |
| (4) Leader-Follower            | 3,795 | 0.077  | -0.356 | -0.207 | 1.000  |        |        |       |       |
| (5) Friendly-Friendly          | 3,795 | 0.119  | -0.179 | -0.171 | 0.051  | 1.000  |        |       |       |
| (6) Friendly-Unfriendly        | 3,795 | 0.012  | 0.225  | 0.005  | -0.115 | -0.635 | 1.000  |       |       |
| (7) Unfriendly-Unfriendly      | 3,795 | -0.141 | -0.090 | 0.176  | 0.089  | -0.274 | -0.568 | 1.000 |       |
| (8) High Business Hour Overlap | 3,795 | -0.437 | -0.313 | 0.045  | -0.089 | 0.012  | -0.094 | 0.104 | 1.000 |

Note: Observations at the airport pair year level, excluding singletons.

### B2. First Stage Regressions

In this section, we show evidence that the 6000-mile threshold is associated with a meaningful discontinuity in the number of available nonstop flights. This relationship is the “first

stage” regression in the fuzzy regression discontinuity. Regressions in the table below show that airport pairs just below the 6000-mile threshold (to the left of the dotted line) have significantly more nonstop flights than airport pairs just above the threshold (to the right of the dotted line). Figure B1 plots the number of nonstop flights between routes, using a linear fit. It shows that the number of nonstop flights above the 6000-mile threshold exhibits a downward trend. The discontinuity uses bins computed through the IMSE-optimal evenly-spaced method using spacings estimators. Optimal bandwidth computation follows the methodology described in Calonico et al. (2020), who build on the work by Imbens and Kalyanaraman (2012).

**Table B3.** First stage of regression discontinuity.

|                                    | (1)                 | (2)                  | (3)                  | (4)                 |
|------------------------------------|---------------------|----------------------|----------------------|---------------------|
| Dep. Var.: Nonstop Flights (asinh) |                     |                      |                      |                     |
| Bandwidth:                         | 250                 | 500                  | 750                  | Optimal             |
| under6000                          | 2.286***<br>(0.309) | 1.313***<br>(0.253)  | 1.340***<br>(0.219)  | 1.418***<br>(0.236) |
| dist6000                           | -0.007**<br>(0.003) | 0.000<br>(0.001)     | 0.000<br>(0.000)     | -0.001<br>(0.001)   |
| dist6000 x<br>under6000            | -0.003<br>(0.004)   | -0.003***<br>(0.001) | -0.002***<br>(0.001) | -0.001<br>(0.001)   |
| Constant                           | 2.198***<br>(0.276) | 2.824***<br>(0.208)  | 2.654***<br>(0.169)  | 2.530***<br>(0.189) |
| Country-pair-year<br>FE            | Y                   | Y                    | Y                    | Y                   |
| Observations                       | 1375                | 3300                 | 5368                 | 4323                |
| Adjusted R <sup>2</sup>            | 0.439               | 0.403                | 0.379                | 0.392               |

*Note:* This table estimates the first stage, using several bandwidths for the estimation in terms of pair of airports at either side of the 6000 miles threshold: 250, 500 and 750 miles, as well as the optimal bandwidth. The Optimal bandwidth computation follows the methodology described in Calonico et al. (2020), who build on the work by Imbens and Kalyanaraman (2012). The estimation uses a triangular weight scheme, giving higher weight to observations closer to the threshold. All specifications include country-country-year fixed effects. Standard errors clustered at the country-country-year level. \*  $p < 0.10$ , \*\*  $p < 0.05$ , \*\*\*  $p < 0.01$

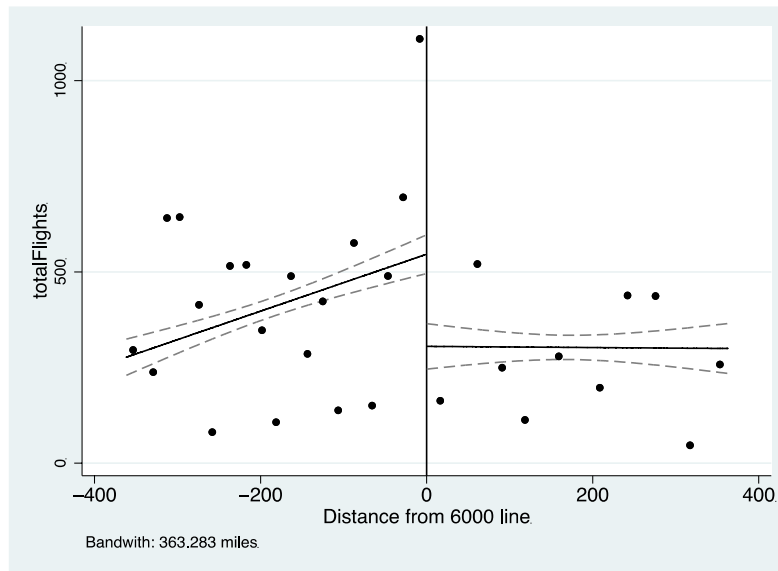**Figure B1.** Discontinuity in number of flights with linear fit.

### B3. Varying the number of bins

One concern regarding the regression discontinuity estimation is that the graphical results may depend on the number of bins used on either side of the threshold. The “optimal” number of bins attempt to minimize the integrated mean-squared error by balancing the trade-off between squared-bias and variance of the local sample means (Cattaneo et al. 2018). In the paper, we utilize the evenly-spaced, or ES method of choosing the number of bins. The ES method yields 15 bins to the left, and 9 bins to the right of the threshold for the RD on citations, and 5 bins to the left, and 15 bins to the right of the threshold for collaborations. Below, we show that the graphical results are robust to varying the number of bins from 25, 50, 100, and 150.

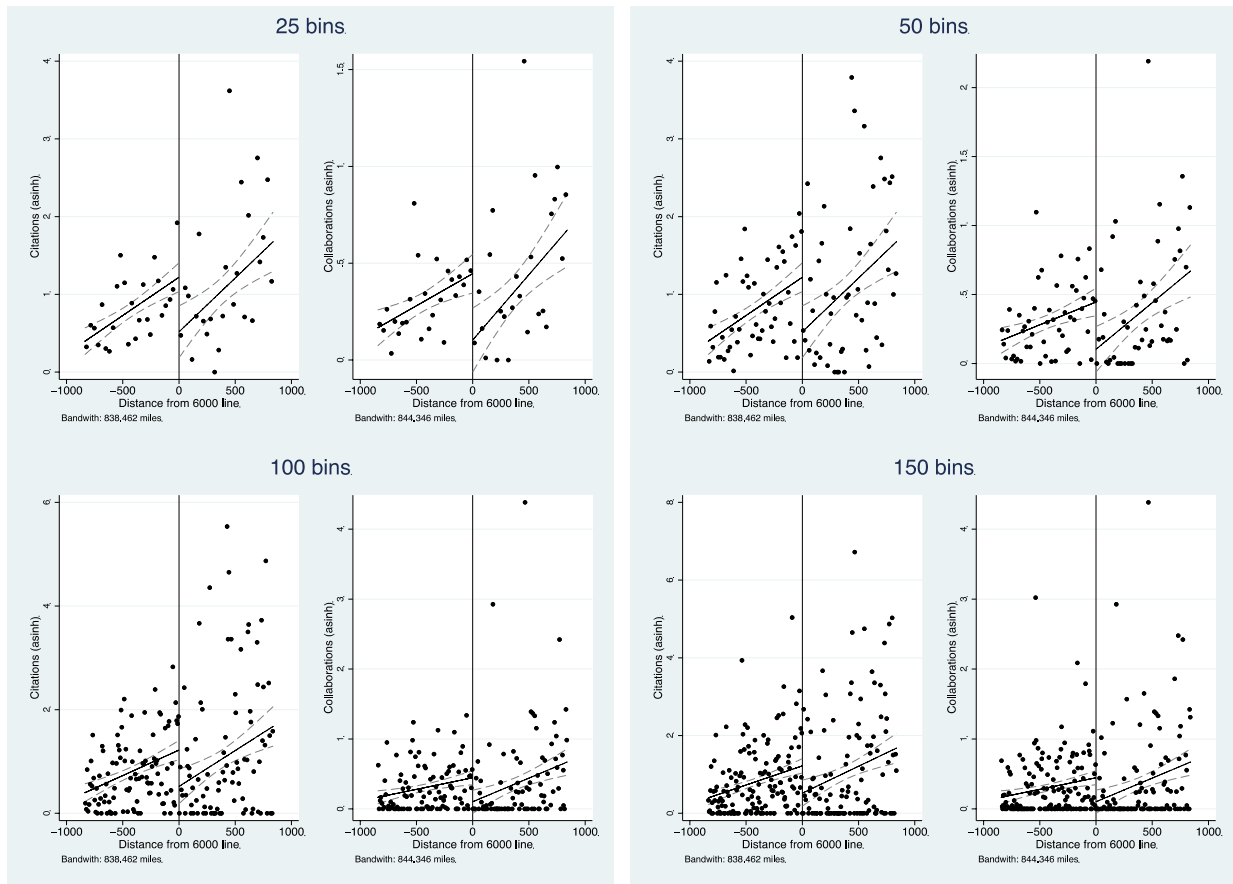

Figure B2. Collaborations and citations below and above the 6000-mile threshold, with varying numbers of bins.

#### B4. Varying the bin selection method

The results are also robust to changes in the bin selection method. The quantile-spaced (QS) method is a popular alternative to ES methods. In the QS method, bins are selected so that each bin contains the same number of observations. We present eight different types of bin selection methods:

- es: IMSE-optimal evenly-spaced method using spacings estimators.
- espr IMSE-optimal evenly-spaced method using polynomial regression.
- esmv mimicking variance evenly-spaced method using spacings estimators.
- esmvpr mimicking variance evenly-spaced method using polynomial regression.
- qs IMSE-optimal quantile-spaced method using spacings estimators.
- qspr IMSE-optimal quantile-spaced method using polynomial regression.
- qsmv mimicking variance quantile-spaced method using spacings estimators.
- qsmvpr mimicking variance quantile-spaced method using polynomial regression.

Since we are restricting the support to the optimal bandwidth, we use only a first-order polynomial to fit the regressions. This is to reduce concerns of overfitting and minimize boundary effects (Cattaneo et al 2019). Figure B3 presents the results with various bin selection methods. We see from the figures that the binning method does not visually change our results. Generally, the ESMV and QSMV are good choices to best depict the overall RD design. Since each point is based on quantiles, the QS method provides an accurate representation of the concentration of observations along our score (airport distance), while the ES method provides similar information, without the direct link to the concentration along the score support.

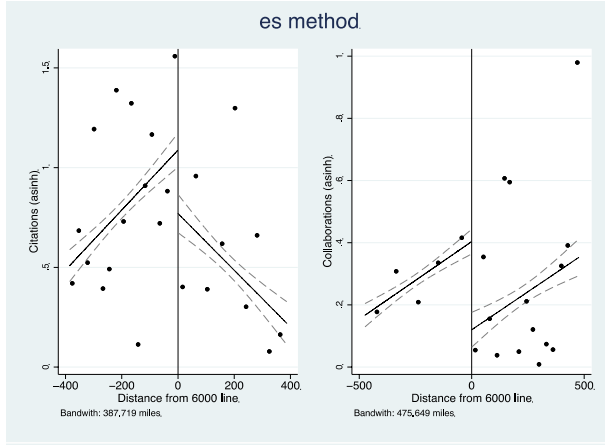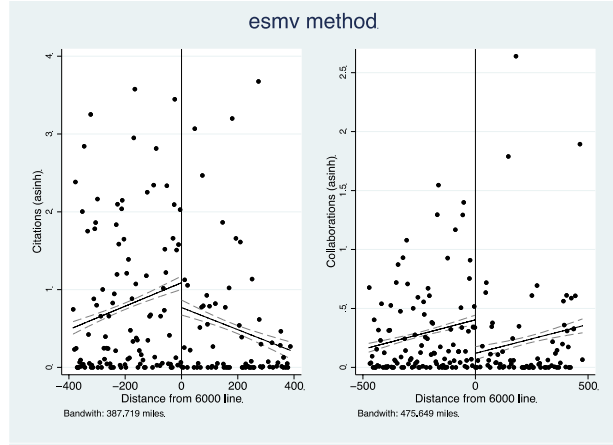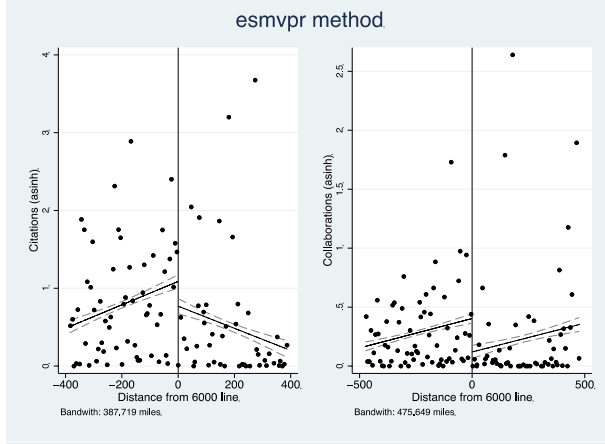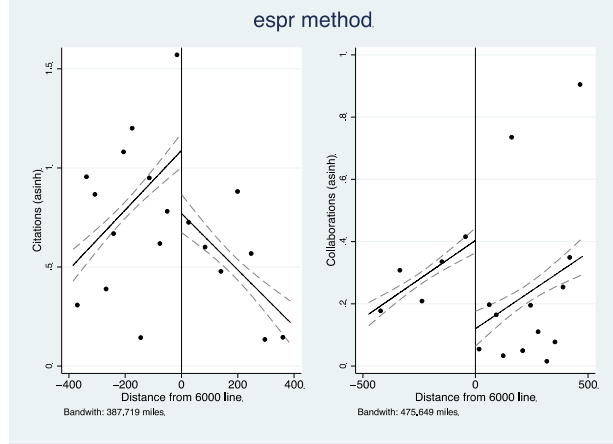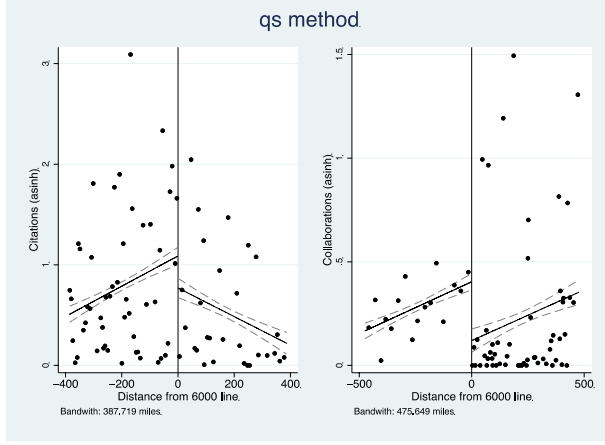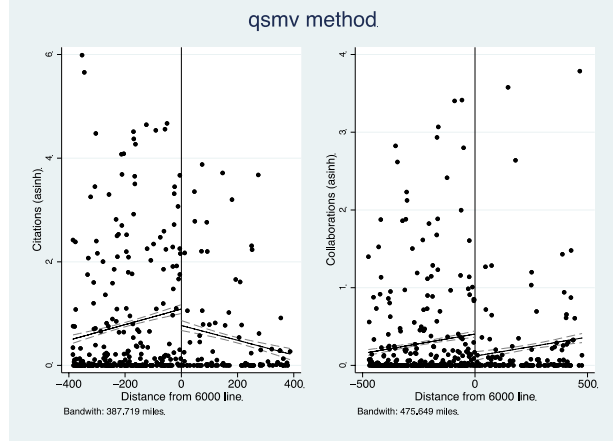

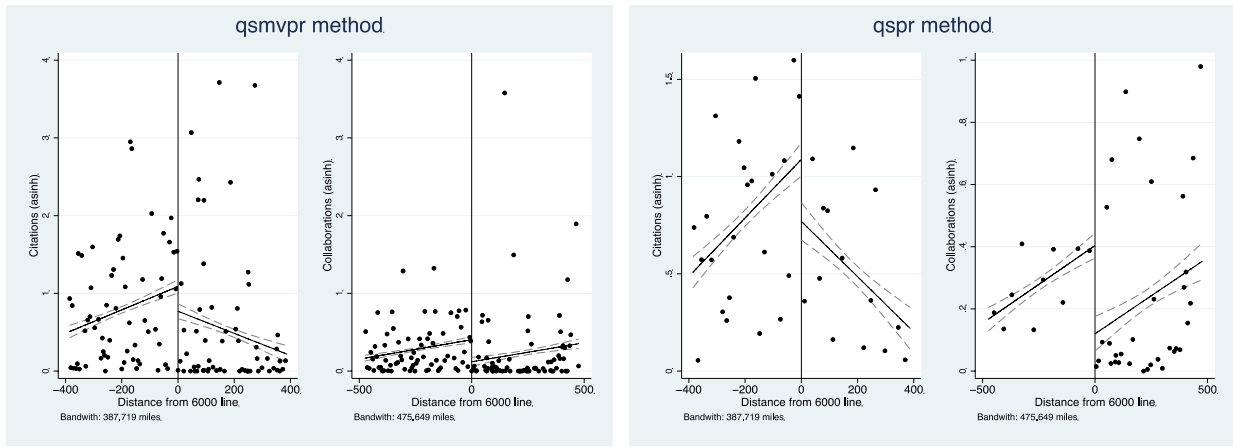

**Figure B3.** Collaborations and citations below and above the 6000-mile threshold, with different bin selection methods. Bin selections are based on combinations of evenly spaced or quantile based, mimicking variance, and whether polynomial regressions are used.

## B5. Varying kernel choice

Next, we test whether the choice of kernel affects the graphical results. The choice of kernel affects how points near the threshold are weighted. Our preferred specification uses a triangular kernel, but graphical results are robust to using either the Epanechnikov kernel or a uniform kernel. For each of the plots below, we see that at the 6000-mile threshold, there exists a visual discontinuity in the number of citations as well as collaborations.

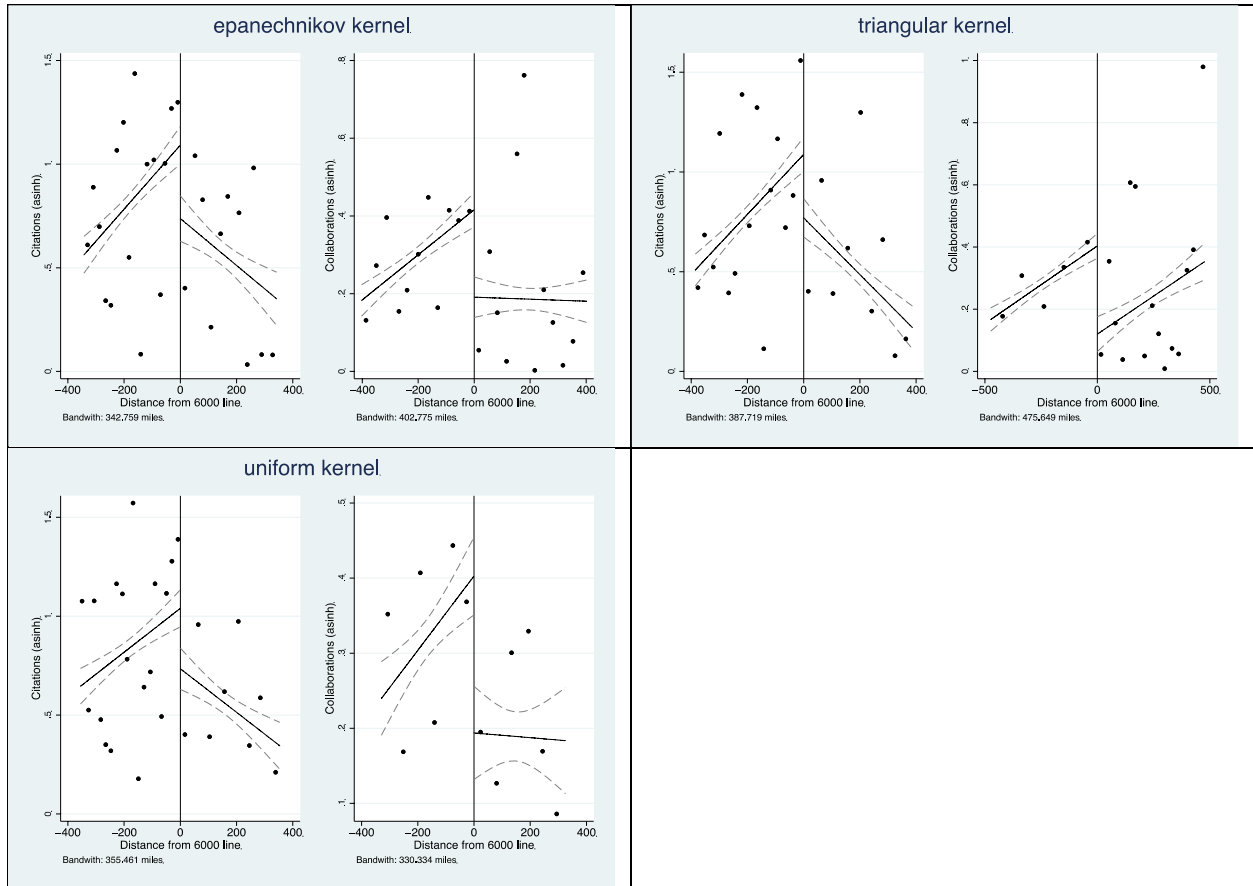

**Figure B4.** Collaborations and citations below and above the 6000-mile threshold, with different kernel choices. Kernel choices determine how much more weight to give to data points near the cutoff.

## B6. Fixed Effects and Clustering

This section, we relax our use of fixed effects at the country-pair year level. Our preferred specification includes country-country-year fixed effects, absorbing the average innovation flows between two countries in a given year. Thus, for each route, we are comparing the effect of an additional flight above and beyond what can be explained by the country pair in a given year. Alternatively, we can include separate fixed effects for the origin country and destination country.

**Table B4.** Regression discontinuity with different fixed effects.

|                         | Citations           |                     |                   |                   | Collaborations      |                     |                   |                   |
|-------------------------|---------------------|---------------------|-------------------|-------------------|---------------------|---------------------|-------------------|-------------------|
|                         | (1)                 | (2)                 | (3)               | (4)               | (5)                 | (6)                 | (7)               | (8)               |
|                         | OC+DC+Y             | OCY+DCY             | OA+DA             | OAY+DAY           | OC+DC+Y             | OCY+DCY             | OA+DA             | OAY+DAY           |
| asinh(Flights)          | 0.605***<br>(0.212) | 0.605***<br>(0.221) | 0.451<br>(0.376)  | 0.451<br>(0.304)  | 0.454***<br>(0.151) | 0.454***<br>(0.171) | 0.755<br>(0.966)  | 0.755<br>(0.933)  |
| dist6000                | 0.001*<br>(0.001)   | 0.001*<br>(0.001)   | -0.001<br>(0.001) | -0.001<br>(0.001) | 0.000<br>(0.000)    | 0.000<br>(0.000)    | 0.001<br>(0.001)  | 0.001<br>(0.001)  |
| dist6000 #<br>under6000 | -0.001<br>(0.001)   | -0.001<br>(0.001)   | 0.001<br>(0.001)  | 0.001<br>(0.001)  | 0.000<br>(0.000)    | 0.000<br>(0.000)    | -0.002<br>(0.002) | -0.002<br>(0.002) |
| Observations            | 3960                | 3498                | 3960              | 2156              | 4983                | 4521                | 4983              | 3069              |

*Note:* Standard errors in parentheses. Fixed effects denoted as following: OC=Origin Country, DC=Destination Country, OA=Origin Airport, DA=Destination Airport, OCY=Origin Country-Year, DCY=Destination Country-Year, OAY=Origin Airport-Year, DAY=Destination Airport-Year. Standard error clustered at the level of fixed effects except for Columns 3 and 7 which use robust standard errors. Both dependent variables are asinh-transformed. In this table, we have included fixed effects for origin country, destination country, and year (Columns 1 and 5), origin country-year, destination country-year (Columns 2 and 6), origin airport, destination airport (Columns 3 and 7), and finally origin airport-year, destination airport-year (Columns 4 and 8).

\*  $p < 0.10$ , \*\*  $p < 0.05$ , \*\*\*  $p < 0.01$

**Table B5.** Regression discontinuity with different levels of clustering.

|                         | Citations         |                     |                     |                     |                   |                     |
|-------------------------|-------------------|---------------------|---------------------|---------------------|-------------------|---------------------|
|                         | (1)               | (2)                 | (3)                 | (4)                 | (5)               | (6)                 |
|                         | OC+DC             | OCY+DCY             | CCY                 | OAY+DAY             | OA+DA             | Robust              |
| asinh(Flights)          | 0.285<br>(0.227)  | 0.285***<br>(0.081) | 0.285***<br>(0.076) | 0.285***<br>(0.090) | 0.285<br>(0.255)  | 0.285***<br>(0.082) |
| dist6000                | -0.001<br>(0.001) | -0.001<br>(0.000)   | -0.001<br>(0.001)   | -0.001<br>(0.001)   | -0.001<br>(0.001) | -0.001<br>(0.001)   |
| dist6000 #<br>under6000 | 0.000<br>(0.003)  | 0.000<br>(0.001)    | 0.000<br>(0.001)    | 0.000<br>(0.001)    | 0.000<br>(0.003)  | 0.000<br>(0.001)    |
| Observations            | 2332              | 2332                | 2332                | 2332                | 2332              | 2332                |
| R <sup>2</sup>          | 0.612             | 0.612               | 0.612               | 0.612               | 0.612             | 0.612               |

|  | Collaborations    |                     |                     |                    |                   |                    |
|--|-------------------|---------------------|---------------------|--------------------|-------------------|--------------------|
|  | (7)               | (8)                 | (9)                 | (10)               | (11)              | (12)               |
|  | OC+DC             | OCY+DCY             | CCY                 | OAY+DAY            | OA+DA             | Robust             |
|  | 0.169<br>(0.145)  | 0.169***<br>(0.056) | 0.169***<br>(0.059) | 0.169**<br>(0.070) | 0.169<br>(0.192)  | 0.169**<br>(0.067) |
|  | -0.000<br>(0.001) | -0.000<br>(0.000)   | -0.000<br>(0.000)   | -0.000<br>(0.000)  | -0.000<br>(0.001) | -0.000<br>(0.000)  |
|  | 0.000<br>(0.001)  | 0.000<br>(0.000)    | 0.000<br>(0.001)    | 0.000<br>(0.001)   | 0.000<br>(0.002)  | 0.000<br>(0.000)   |
|  | 3146              | 3146                | 3146                | 3146               | 3146              | 3146               |
|  | 0.442             | 0.442               | 0.442               | 0.442              | 0.442             | 0.442              |

*Note:* Standard errors in parentheses, clustered at the country-pair-year level. All specifications include country-pair-year fixed effects. Both dependent variables are asinh-transformed. This table includes two-way clustering at the origin country plus year clustering (OCY) and at the destination country plus year clustering (DCY), as well as clustering at the origin airport plus year clustering (OAY) and at the destination airport with year clustering (DAY). After restricting the sample to around the 6000-mile threshold, we have 3,795 observations across 1,116 clusters.

\*  $p < 0.10$ , \*\*  $p < 0.05$ , \*\*\*  $p < 0.01$

## B7. Higher order polynomials for the reduced form

We next check whether our RD results are sensitive to the polynomial order that we use. Lee and Lemieux (2010) suggest that plotting higher order polynomials may enhance the visual impact of the graph, and also suggest that it is essential to check that the RD results are robust to the inclusion of higher order polynomial terms. Thus, in this section, we check whether graphically, our results are robust to modeling higher order polynomials.

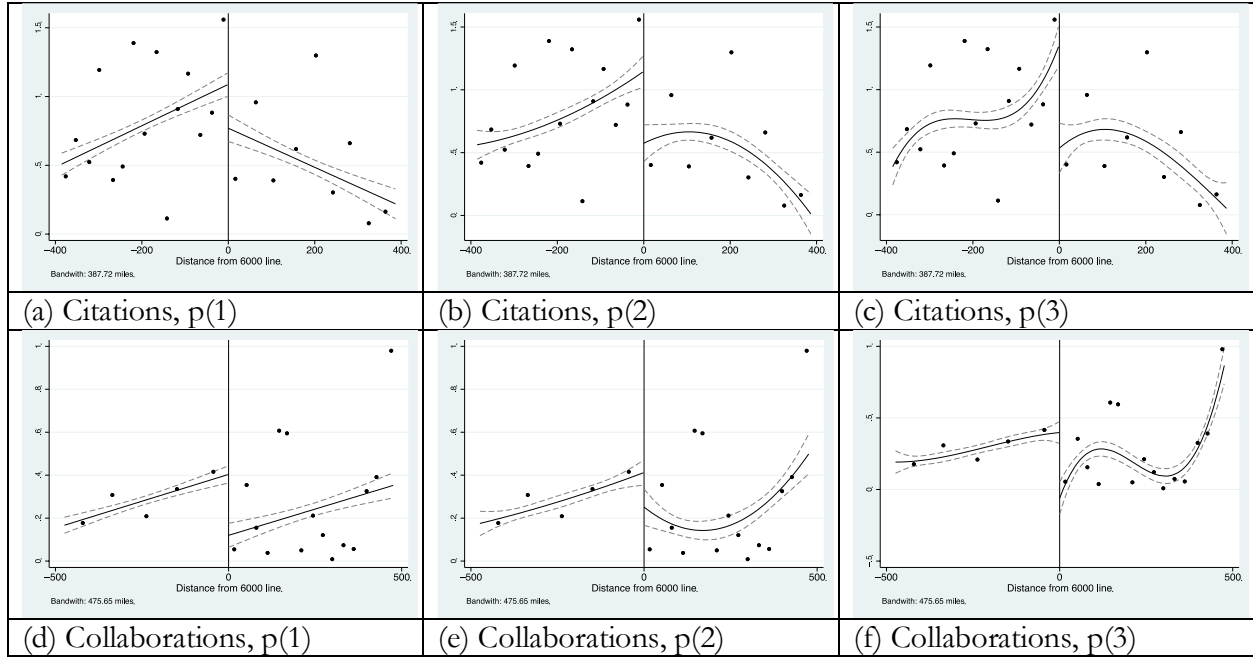

**Figure B5.** Higher order polynomial estimates of the regression discontinuity.

Each figure contains plots using the `rdplot` command in Stata, using polynomials of differing orders.

We see that for both citations and collaborations, we see a discontinuous jump at the 6000-mile mark. In all panels, we observe the 95% confidence intervals do not overlap, and the results are therefore statistically significant. The magnitude of the effects seem to change slightly: the impact of nonstop flights on citations increases when using higher order polynomials, but the effect on collaborations decreases when using a second order polynomial.

## B8. Placebo thresholds

Next, we test whether our treatment of increased operating costs at the 6000-mile threshold is indeed meaningful. Towards this, we check whether we observe (or do not observe) similar discontinuities at placebo thresholds {Citation}. Since the 6000-mile threshold is an approximate cutoff for a 12-hour flight, it is a fuzzy discontinuity. Thus, far away from the 6000-mile threshold, we should see the treatment effect is zero. To test this, we estimate the regression discontinuity at various placebo thresholds. Specifically, for  $c^* \in [4000, 9000]$  in 25 mile intervals, we estimate a 2SLS model with the first stage equation given by:

$$\begin{aligned} & \text{Nonstop Flights}_{a_o, a_d, t} \\ &= \gamma_1 1\{Dist_{a_o, a_d} < c^*\} + \gamma_2 (Dist_{a_o, a_d} - c^*) \\ &+ \gamma_3 1\{Dist_{a_o, a_d} < c^*\} \times (Dist_{a_o, a_d} - c^*) + \phi_{c_o, c_d, t} + \epsilon_{a_o, a_d, t} \end{aligned}$$

And the second stage is given by:

$$\begin{aligned} \log(Y_{a_o, a_d, t}) &= \beta_1 \widehat{\text{Nonstop Flights}}_{a_o, a_d, t} + \beta_2 (Dist_{a_o, a_d} - c^*) \\ &+ \beta_3 1\{Dist_{a_o, a_d} < c^*\} \times D(Dist_{a_o, a_d} - c^*) + \phi_{c_o, c_d, t} + \epsilon_{a_o, a_d, t} \end{aligned}$$

The idea is that if there is a sharp discontinuity at the 6000-mile mark, for all  $c^* \neq 6,000$ , we should see that  $\widehat{\beta}_1 = 0$ . Since our discontinuity is fuzzy, we should see instead that for cutoffs far away from the 6000-mile mark, we don't observe significant coefficients. As we will discuss, since citation and collaboration outcomes are driven by airport pairs with high innovation mass, we may observe some cutoffs that show significant coefficient estimates (e.g., Pacific flights connecting the U.S. with Asia). To avoid misspecification, we split the sample into [4000, 5950] and [6050, 9000] and estimate the discontinuity for those two samples. We first present results for citations and collaborations.

For citations (Figure B5), we see that most of the coefficients are statistically insignificant from zero. Since this is a fuzzy regression discontinuity, we see some significant placebo thresholds near the 6000-mile line. There appear to be a cluster of significant coefficients near the 4500 mile line, or a 9 hour flight. This effect is driven by the presence of airport pairs with high innovation mass, particularly between the US West coast and Asian countries, and is to be expected. Specifically, for citations, the placebo thresholds of 4575, 4600, 4650, 4750 miles are significant. Note that coefficients below the 4700-mile mark are positive, but become negative as the placebo threshold shifts right. As the placebo threshold moves, high-innovation mass routes between Asia and the US (e.g., SEA-HND, PDX-NRT) switch from control to treatment, and decreases the effect of additional flights. Thus, we are confident such changes are unrelated to our 6000-mile instrument.

Similarly, for collaborations (Figure B6), we see that most coefficients are statistically insignificant from zero, and the majority of significant coefficients can be found between 5500-6500. We also conduct the placebo test over the entire support of the dataset (Figure B7). Again, for collaborations, there is a small cluster of significant coefficients near the 4500-mile mark, but there is stronger evidence of a cutoff near the 6000-mile threshold.

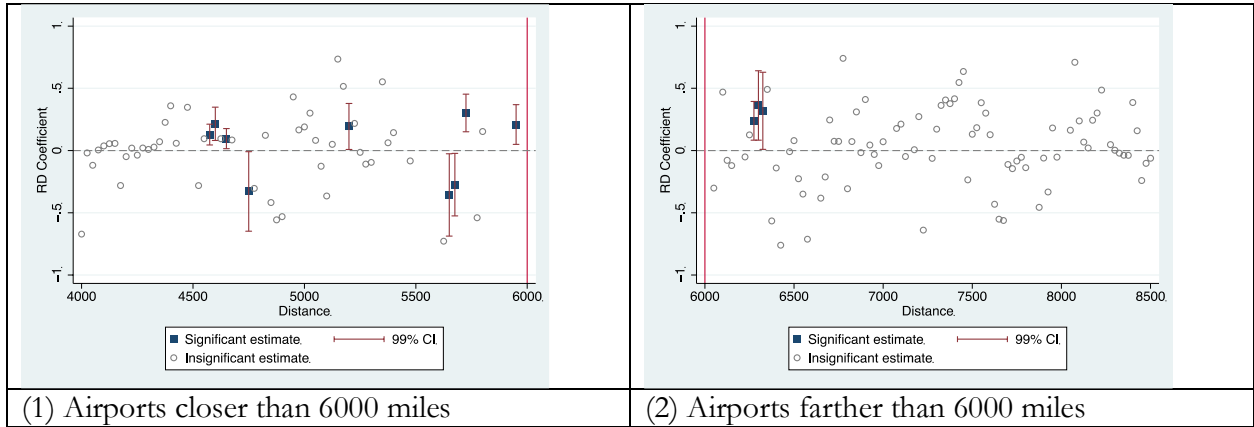

**Figure B5.** Effect of placebo thresholds on citations

Each dot represents an estimate of  $\beta_1$ , the effect of a 1% increase in nonstop flights between two airports, assuming there exists a discontinuity at the given distance. Red lines denote 99% confidence intervals. Gray dots denote coefficients that are insignificant. Coefficients with absolute values greater than 1 are omitted for visualization purposes (all insignificant).

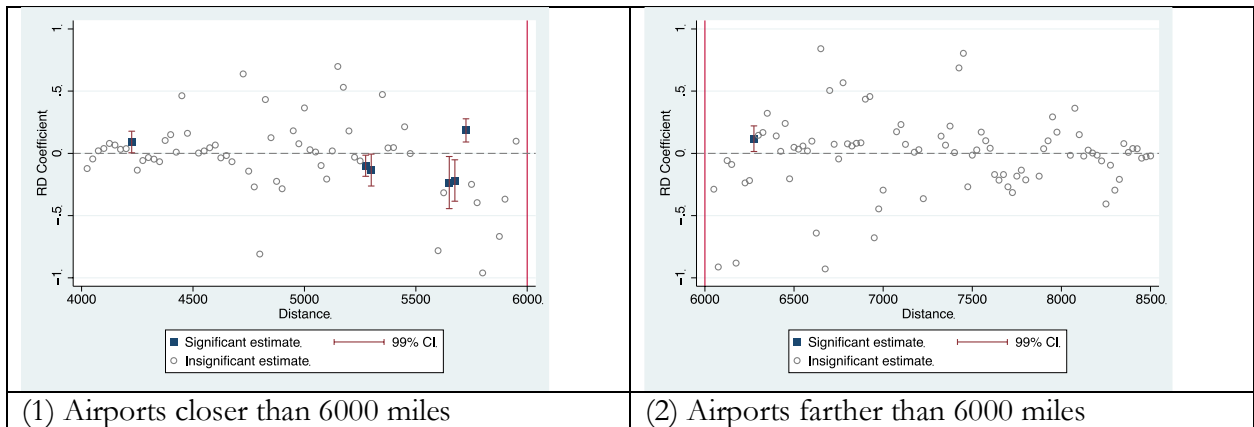

**Figure B6.** Effect of placebo thresholds on collaborations

Each dot represents an estimate of  $\beta_1$ , the effect of a 1% increase in nonstop flights between two airports, assuming there exists a discontinuity at the given distance. Red lines denote 99% confidence intervals. Gray dots denote coefficients that are insignificant. Coefficients with absolute values greater than 1 are omitted for visualization purposes (all insignificant).

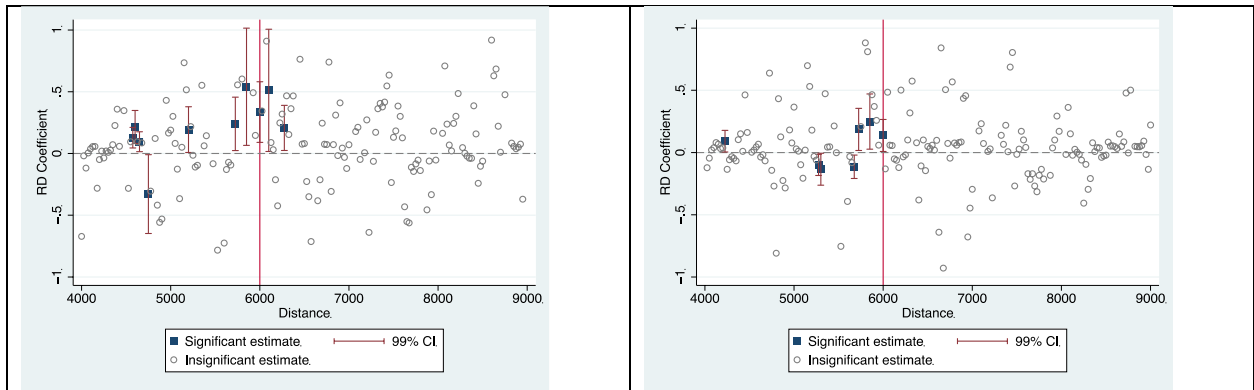

**Figure B7.** Effect of placebo thresholds across the entire support

Each dot represents an estimate of  $\beta_1$ , the effect of a 1% increase in nonstop flights between two airports, assuming there exists a discontinuity at the given distance. Red lines denote 99% confidence intervals. Gray dots denote coefficients that are insignificant. Coefficients with absolute values greater than 1 are omitted for visualization purposes (all insignificant).

**B9. Density of running variable**

An important assumption underlying the RDD is that the subjects cannot precisely manipulate their scores (Imbens and Lemieux 2008). This may happen, for instance, for birthdays and school year cutoffs. In the case of airport pairs, such concerns may arise if airport authorities decide locations so that they maximize the number of airports within 6000 miles. While unlikely, if it were the case, we would see a bump in an airport’s “potential connections” just below the 6000-mile threshold. We do a nonparametric test using airport locations and all possible airport pair permutations, and plotting whether there are more potential airport pairs just below the 6000-mile line. From the figure below, we see that there is no evidence of bunching near the 6000-mile threshold.

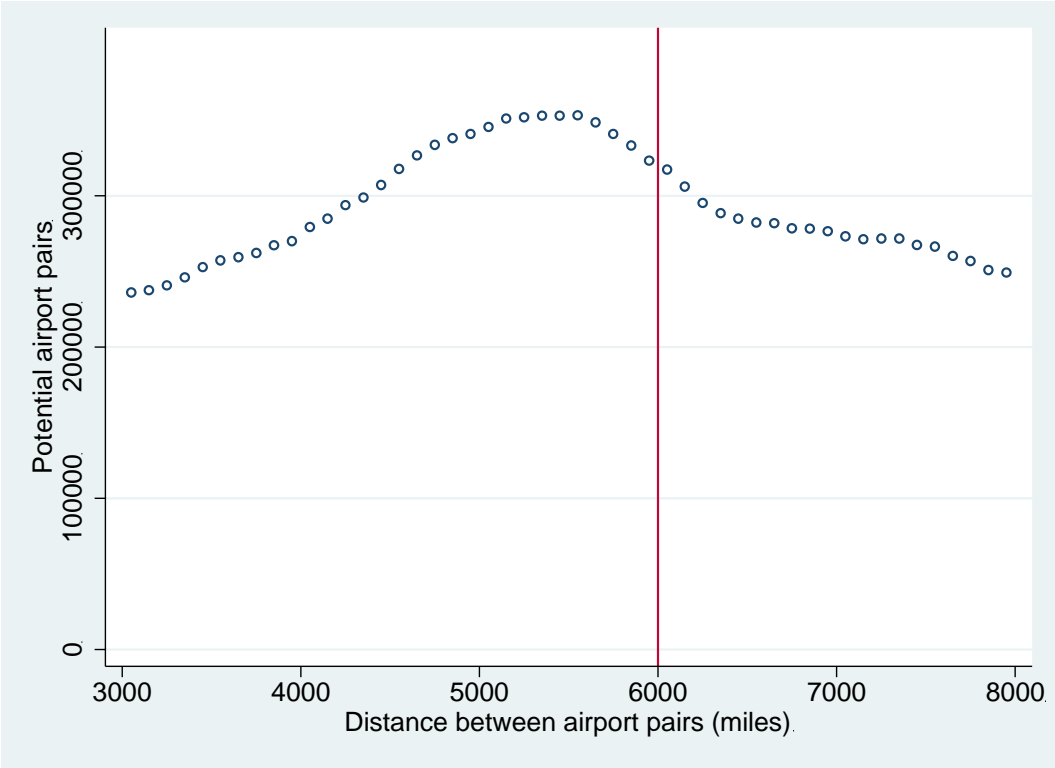

**Figure B8.** Nonparametric test of bunching near the 6000-mile threshold  
Each point on this plot represents the “potential” number of airport pairs (y-axis) within a specified distance (x-axis). The “potential” number of airport pairs is taken from counting all pairwise combinations of all airport pairs in our dataset.

## B10. Cross-assignee results

To better understand our results, we also study whether the effect of nonstop flights is greater within or across assignees. An assignee can be either an inventor or, in most cases, a firm to which a patent's ownership is assigned. One would expect that if indeed flight connectivity causes more knowledge flows, it should in fact disproportionately facilitate cross-assignee knowledge flows. This is because cross-assignee knowledge flows, which usually involve the crossing of geographic and/or organizational boundaries, are typically costlier than knowledge flows within firms.

To explore this possibility, we count the number of cross-assignee and within-assignee citations that happen between airports. To count the number of cross-assignee citations, we exclude patent-citation pairs that share the same assignee, then aggregate the number of citations to the airport-pair level. Similarly, we count only those patent-citation pairs that share the same assignee for within-assignee citations. For any airport pair, the sum of the cross-assignee and within-assignee citations is equal to the citations number defined above.

Table below shows the results from estimating the RD specification (equation (1) in the main paper) using cross-assignee and within-assignee citations as dependent variables. The dependent variable for Columns 1 and 2 is the number of citations across different assignees for a given airport pair, while the dependent variable for Columns 3 and 4 is the number of citations within the same assignee. The estimates for cross-assignee knowledge spillovers (Columns 1 and 2) are similar in magnitude to the estimates of the full count shown in the main results. This is because the 95% of the citations in our data are cross-assignee citations. With this caveat, nonstop flights have little effect on within-assignee knowledge flows as shown in Columns 3 and 4, where we cannot distinguish any statistical significance in the estimates. But this could be because in Columns 3 and 4 has very little variation to exploit.

**Table B6.** Regression discontinuity analysis of within-assignee and cross-assignee citations.

|                                  | Cross Assignee        |                       | Within Assignee       |                     |
|----------------------------------|-----------------------|-----------------------|-----------------------|---------------------|
|                                  | (1)<br>Citations      | (2)<br>Citations      | (3)<br>Citations      | (4)<br>Citations    |
| Bandwidth                        | 500                   | Optimal               | 500                   | Optimal             |
| Nonstop Flights<br>(asinh)       | 0.3328***<br>(0.0937) | 0.2670***<br>(0.0689) | 0.0749**<br>(0.0351)  | 0.0312<br>(0.0218)  |
| (6000 – Distance)                | 0.0010**<br>(0.0004)  | 0.0003<br>(0.0002)    | 0.0005**<br>(0.0002)  | -0.0001<br>(0.0001) |
| (6000 – Distance) x<br>Under6000 | -0.0011<br>(0.0008)   | -0.0002<br>(0.0003)   | -0.0009**<br>(0.0004) | -0.0001<br>(0.0001) |
| Observations                     | 3300                  | 4323                  | 3300                  | 4323                |
| R <sup>2</sup>                   | 0.509                 | 0.625                 | 0.243                 | 0.423               |

*Note:* Standard errors in parentheses, clustered at the country-country level. Both dependent variables are asinh-transformed. Optimal bandwidth calculation follows the methodology described in Cattaneo et al. (2018). \*  $p < 0.10$ , \*\*  $p < 0.05$ , \*\*\*  $p < 0.01$ .

### B11. Effects not driven by one-stop flights

This section further discusses how the existence of nonstop flights (and not other types of multi-stop flights) are driving the results. For the subsample of routes for which flight duration and prices are available, we test whether the 6000-mile threshold drives flights with layovers, and how innovation outcomes correlate with routes with nonstop/one-stop/multiple stops. Again, the subsample of routes includes those flights that are longer than 3000-miles apart, and have more than 1000 flights total in our 2005-2015 time period.

Figure B9 shows the results from a kernel-weighted local polynomial regression of the probability of a route having one or two stop flights, and the length of the route. We see that around the 6000-mile mark, there is no discernable difference in the likelihood of having one-stop flights, and two-stop flights seem to increase for longer flights.

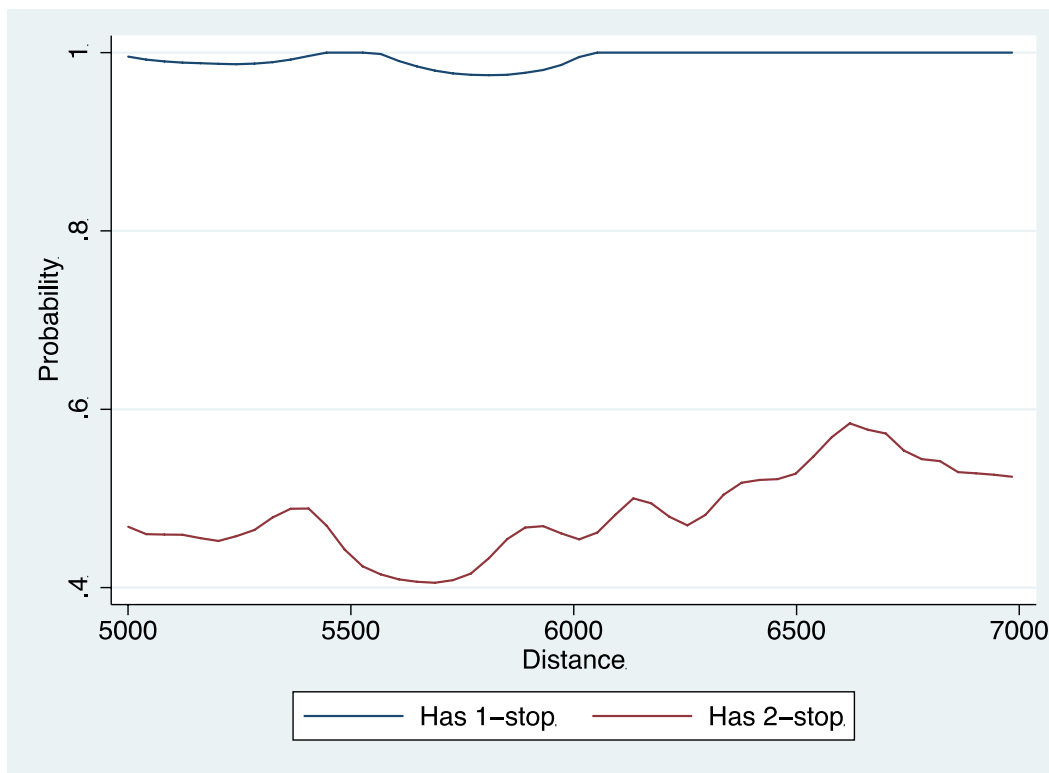

**Figure B9.** Probability of having 1-stop and 2-stop flights across distance

We confirm the visual results in regression form in the table below. We see that for all bandwidths, the 6000-mile discontinuity does not impact the probability of having a one-stop flight. Thus, routes just beneath and just above the 6000-mile threshold we use in the regression discontinuity differ only in the existence of nonstop flights, not one-stop flights. While not shown here, two-stop flights slightly increase after 6000 miles, but this would go against our findings.

**Table B7.** First stage using one-stop flights only.

|                                | (1)                 | (2)                 | (3)                 | (4)                 | (5)                 |
|--------------------------------|---------------------|---------------------|---------------------|---------------------|---------------------|
| Dep. Var.: Has One-stop Flight |                     |                     |                     |                     |                     |
| Bandwidth (miles)              | 500                 | 750                 | 1000                | 1250                | Optimal             |
| Under6000                      | 0.001<br>(0.001)    | -0.027<br>(0.027)   | -0.011<br>(0.011)   | -0.007<br>(0.008)   | -0.012<br>(0.012)   |
| 6000 – Distance                | -0.000<br>(0.000)   | 0.000<br>(0.000)    | 0.000<br>(0.000)    | 0.000<br>(0.000)    | 0.000<br>(0.000)    |
| (6000 – Distance) x under6000  | 0.000<br>(0.000)    | -0.000<br>(0.000)   | -0.000<br>(0.000)   | -0.000<br>(0.000)   | -0.000<br>(0.000)   |
| Constant                       | 0.989***<br>(0.001) | 0.987***<br>(0.008) | 0.991***<br>(0.003) | 0.992***<br>(0.002) | 0.991***<br>(0.003) |
| Observations                   | 78                  | 122                 | 197                 | 269                 | 184                 |
| R <sup>2</sup>                 | 0.494               | 0.340               | 0.332               | 0.331               | 0.332               |

*Note:* This table estimates the first stage, using several bandwidths for the estimation in terms of pair of airports at either side of the 6000 miles threshold: 500, 750, 1000, 1250 miles, as well as the optimal bandwidth. The optimal bandwidth is computed using the methodology described in Cattaneo et al. (2018) who build on the work by Imbens and Kalyanaraman (2012). In addition, the estimation uses a triangular weight scheme, giving higher weight to observations closer to the cutoff point. All specifications include country-country fixed effects. Standard errors clustered at the country-country level. \*  $p < 0.10$ , \*\*  $p < 0.05$ , \*\*\*  $p < 0.01$

## B12. Poisson regressions, Log+1 transformations and raw counts

Our use of the asinh-transformed variables is motivated by Burbidge, Magee, and Robb (1988), MacKinnon and Magee (1990) who show the inverse hyperbolic sine transformation allows researchers to preserve observations with zero flights.

We used the Stata package PPMLHDFE to check whether our results hold in a sharp regression discontinuity setting. That is, we estimate the following specification

$$Y_{a_o,a_d,t} = f(\gamma_0 + \gamma_1 \text{Under6000}_{a_o,a_d} + \gamma_2 \text{Dist6000}_{a_o,a_d} + \gamma_3 \text{Under6000}_{a_o,a_d} \times \text{Dist6000}_{a_o,a_d} + X_{a_o,a_d} \xi)$$

Our coefficient of interest is  $\gamma_1$ , the magnitude of the discontinuity at the 6000-mile mark. The estimates are reported below.

**Table B8.** Regression discontinuity using PQML.

|                         | Overall              |                       | Academic             |                       | Firms                |                       |
|-------------------------|----------------------|-----------------------|----------------------|-----------------------|----------------------|-----------------------|
|                         | (1)<br>Citations     | (2)<br>Collaborations | (3)<br>Citations     | (4)<br>Collaborations | (5)<br>Citations     | (6)<br>Collaborations |
| under6000               | 1.555***<br>(0.143)  | 0.662***<br>(0.238)   | 1.870***<br>(0.243)  | 1.599***<br>(0.482)   | 1.556***<br>(0.146)  | 0.634***<br>(0.243)   |
| dist6000                | -0.004***<br>(0.000) | -0.002**<br>(0.001)   | -0.003***<br>(0.001) | -0.002**<br>(0.001)   | -0.004***<br>(0.000) | -0.002**<br>(0.001)   |
| dist6000 #<br>under6000 | 0.005***<br>(0.001)  | 0.001<br>(0.001)      | 0.004***<br>(0.001)  | 0.001<br>(0.001)      | 0.005***<br>(0.001)  | 0.001<br>(0.001)      |
| Constant                | 1.921***<br>(0.154)  | 1.160***<br>(0.247)   | -1.951***<br>(0.225) | -2.141***<br>(0.387)  | 1.856***<br>(0.158)  | 1.144***<br>(0.250)   |
| Observations            | 2472                 | 1901                  | 1074                 | 731                   | 2418                 | 1870                  |

*Note:* Standard errors in parentheses. Since these are Poisson models, the dependent variables are raw counts of citations and collaborations at the airport pair year level. Note that the number of observations for Poisson regressions is smaller than for linear regressions because of the separation problem (Correia, Guimaraes, and Zylkin, 2021; Santos Silva and Tenreyro, 2006). In short, maximum likelihood solutions of Poisson models may not have a solution when regressors are perfectly collinear over the subsample where the dependent variable is nonzero. The solution implemented by PPMLHDFE is to drop observations that are separated.

\*  $p < 0.10$ , \*\*  $p < 0.05$ , \*\*\*  $p < 0.01$

Instead of scaling by the number of flights in the first stage, we also scale by the existence of nonstop flights. Specifically, our first and second stages are

$$\text{HasNonstop}_{a_o,a_d,t} = \alpha_0 \mathbf{1}(\text{Dist6000} > 0) + \alpha_1 \text{Dist6000} + \alpha_2 \mathbf{1}(\text{Dist6000} > 0) \times \text{Dist6000} + \epsilon$$

$$Y_{a_o,a_d,t} = \beta_0 \widehat{\text{HasNonstop}}_{a_o,a_d,t} + \beta_1 \text{Dist6000} + \beta_2 \mathbf{1}(\text{Dist6000} > 0) \times \text{Dist6000} + \epsilon$$

The coefficient of interest is  $\beta_0$ , the predicted probability of having a nonstop flight.  $\beta_0$  thus measures how having any nonstop flight affects citations and collaborations. This is in contrast

with our main specification, which measures the impact of increased flights. The table below shows the results.

**Table B9.** Discrete effect of having nonstop flights on knowledge diffusion.

|                        | Citations            |                      | Collaborations      |                     |
|------------------------|----------------------|----------------------|---------------------|---------------------|
|                        | (1)                  | (2)                  | (3)                 | (4)                 |
| Bandwidth:             | 550                  | Optimal              | 550                 | Optimal             |
| HasNonstop             | 3.140 <sup>***</sup> | 2.604 <sup>***</sup> | 1.376 <sup>**</sup> | 1.556 <sup>**</sup> |
|                        | (1.167)              | (0.878)              | (0.584)             | (0.682)             |
| dist6000               | -0.001 <sup>**</sup> | -0.001               | -0.000              | -0.000              |
|                        | (0.001)              | (0.001)              | (0.000)             | (0.000)             |
| c.dist6000#c.under6000 | 0.002                | 0.001                | 0.000               | 0.000               |
|                        | (0.001)              | (0.001)              | (0.001)             | (0.001)             |
| <i>N</i>               | 3795                 | 2332                 | 3795                | 3146                |

*Note:* Standard errors in parentheses, clustered at the country pair-year level. HasNonstop is equal to 1 if the number of total flights at the airport pair-year is greater than zero.

\*  $p < 0.10$ , \*\*  $p < 0.05$ , \*\*\*  $p < 0.01$

**Table B10.** Regression discontinuity using raw counts of citations and collaborations as dependent variables.

|                         | Overall               |                      | Academic              |                     | Firms                 |                      |
|-------------------------|-----------------------|----------------------|-----------------------|---------------------|-----------------------|----------------------|
|                         | (1)                   | (2)                  | (3)                   | (4)                 | (5)                   | (6)                  |
|                         | Citations             | Collaborations       | Citations             | Collaborations      | Citations             | Collaborations       |
| Nonstop Flights (asinh) | 13.164 <sup>***</sup> | 0.722 <sup>**</sup>  | 0.218 <sup>***</sup>  | 0.058 <sup>**</sup> | 12.355 <sup>***</sup> | 0.660 <sup>**</sup>  |
|                         | (3.737)               | (0.293)              | (0.069)               | (0.025)             | (3.495)               | (0.281)              |
| dist6000                | -0.083 <sup>***</sup> | -0.004 <sup>**</sup> | -0.001 <sup>***</sup> | -0.000 <sup>*</sup> | -0.078 <sup>***</sup> | -0.004 <sup>**</sup> |
|                         | (0.023)               | (0.002)              | (0.000)               | (0.000)             | (0.022)               | (0.002)              |
| dist6000 # under6000    | 0.128 <sup>***</sup>  | 0.005 <sup>*</sup>   | 0.002 <sup>***</sup>  | 0.000 <sup>*</sup>  | 0.120 <sup>***</sup>  | 0.005 <sup>*</sup>   |
|                         | (0.036)               | (0.003)              | (0.001)               | (0.000)             | (0.033)               | (0.003)              |
| Observations            | 3795                  | 3795                 | 3795                  | 3795                | 3795                  | 3795                 |

*Note:* Standard errors in parentheses. The dependent variables use raw counts of citations and collaborations.

\*  $p < 0.10$ , \*\*  $p < 0.05$ , \*\*\*  $p < 0.01$

**Table B11.** Regression discontinuity using log+1 transformation.

|                            | Overall          |                       | Academic         |                       | Firms            |                       |
|----------------------------|------------------|-----------------------|------------------|-----------------------|------------------|-----------------------|
|                            | (1)<br>Citations | (2)<br>Collaborations | (3)<br>Citations | (4)<br>Collaborations | (5)<br>Citations | (6)<br>Collaborations |
| Nonstop Flights<br>(asinh) | 0.304***         | 0.124***              | 0.077***         | 0.032**               | 0.296***         | 0.121***              |
|                            | (0.088)          | (0.043)               | (0.023)          | (0.012)               | (0.086)          | (0.042)               |
| dist6000                   | -0.001**         | -0.000                | -0.000**         | -0.000*               | -0.001**         | -0.000                |
|                            | (0.000)          | (0.000)               | (0.000)          | (0.000)               | (0.000)          | (0.000)               |
| dist6000 #<br>under6000    | 0.001*           | 0.000                 | 0.000**          | 0.000*                | 0.001**          | 0.000                 |
|                            | (0.001)          | (0.000)               | (0.000)          | (0.000)               | (0.001)          | (0.000)               |
| Observations               | 3795             | 3795                  | 3795             | 3795                  | 3795             | 3795                  |

*Note:* Standard errors in parentheses. Both dependent variables are transformed using “log + 1”.

\*  $p < 0.10$ , \*\*  $p < 0.05$ , \*\*\*  $p < 0.01$

### B13. Pooling airports at cities

**Table B12.** Pooled airport analysis.

|                            | Overall             |                       | Academic            |                       | Firms               |                       |
|----------------------------|---------------------|-----------------------|---------------------|-----------------------|---------------------|-----------------------|
|                            | (1)<br>Citations    | (2)<br>Collaborations | (3)<br>Citations    | (4)<br>Collaborations | (5)<br>Citations    | (6)<br>Collaborations |
| Nonstop Flights<br>(asinh) | 0.303***<br>(0.082) | 0.133***<br>(0.045)   | 0.089***<br>(0.025) | 0.036***<br>(0.013)   | 0.295***<br>(0.081) | 0.129***<br>(0.043)   |
| dist6000                   | -0.001*<br>(0.000)  | -0.000<br>(0.000)     | -0.000*<br>(0.000)  | -0.000*<br>(0.000)    | -0.001*<br>(0.000)  | -0.000<br>(0.000)     |
| dist6000 #<br>under6000    | 0.001<br>(0.001)    | 0.000<br>(0.000)      | 0.001**<br>(0.000)  | 0.000*<br>(0.000)     | 0.001<br>(0.001)    | 0.000<br>(0.000)      |
| Observations               | 3322                | 3322                  | 3322                | 3322                  | 3322                | 3322                  |

*Note:* Standard errors in parentheses, clustered at the country-country-year level. All specifications include country-country-year fixed effects. Observations are at the city pair-year level. Both dependent variables are asinh-transformed. In this table, we pool all airports in a given city. Specifically, we collected a list of cities served by multiple airports<sup>11</sup> and used it to aggregate from the airport pair to the city pair level. For cities served by multiple airports, we took the sum of all citations, collaborations, and flights to create those measures at the city-pair level. For distances between cities, we take the average distance between all airports between the cities. We keep all other airport pairs.

\*  $p < 0.10$ , \*\*  $p < 0.05$ , \*\*\*  $p < 0.01$

**Table B13.** Flight effects on knowledge diffusion are greater for flights with at least one U.S. city.

|                         | Entire Sample       |                       | At Least One U.S. City |                       |
|-------------------------|---------------------|-----------------------|------------------------|-----------------------|
|                         | (1)<br>Citations    | (2)<br>Collaborations | (3)<br>Citations       | (4)<br>Collaborations |
| Nonstop Flights (asinh) | 0.335***<br>(0.095) | 0.137***<br>(0.050)   | 0.959***<br>(0.276)    | 0.445***<br>(0.138)   |
| dist6000                | -0.001**<br>(0.000) | -0.000<br>(0.000)     | -0.002**<br>(0.001)    | -0.001<br>(0.001)     |
| dist6000 # under6000    | 0.001<br>(0.001)    | 0.000<br>(0.001)      | 0.007***<br>(0.002)    | 0.003**<br>(0.001)    |
| Observations            | 3300                | 3300                  | 858                    | 858                   |

*Note:* Bandwidth at 500 miles. Standard errors in parentheses, clustered at the country-pair-year level. All specifications include country-pair-year fixed effects. Both dependent variables are asinh-transformed.

\*  $p < 0.10$ , \*\*  $p < 0.05$ , \*\*\*  $p < 0.01$

<sup>11</sup> [https://en.wikipedia.org/wiki/List\\_of\\_cities\\_with\\_more\\_than\\_one\\_commercial\\_airport](https://en.wikipedia.org/wiki/List_of_cities_with_more_than_one_commercial_airport)

## Appendix C. Mass Variables

Our paper adopts several measures for innovation “mass”: innovation hubs, leaders versus followers, and firm-level data such as R&D spending. This section delves into the mass variables in more detail.

### C1. List of hubs

Of the 5,015 airports in our dataset, 965 are near innovation hubs. Again, we categorize an airport as being near innovation hubs if the airport is within a 50-mile radius of the innovation hubs listed in Bikard and Marx (2020). Below, we present the 20 largest hubs and 20 largest non-hubs in our dataset, based on the total number of outbound flights from those airports in 2005-2015.

**Table C1.** List of hubs.

a) Hubs

| <b>Airport Code</b> | <b>Country (ISO Code)</b> | <b>Airport Name</b>                              |
|---------------------|---------------------------|--------------------------------------------------|
| ATL                 | US                        | Hartsfield Jackson Atlanta International Airport |
| LHR                 | GB                        | London Heathrow Airport                          |
| PEK                 | CN                        | Beijing Capital International Airport            |
| HND                 | JP                        | Tokyo Haneda International Airport               |
| ORD                 | US                        | Chicago O'Hare International Airport             |
| LAX                 | US                        | Los Angeles International Airport                |
| CDG                 | FR                        | Charles de Gaulle International Airport          |
| FRA                 | DE                        | Frankfurt am Main Airport                        |
| DFW                 | US                        | Dallas Fort Worth International Airport          |
| HKG                 | HK                        | Chek Lap Kok International Airport               |
| DEN                 | US                        | Denver International Airport                     |
| MAD                 | ES                        | Madrid-Barajas Adolfo Suárez Airport             |
| JFK                 | US                        | John F Kennedy International Airport             |
| SIN                 | SG                        | Singapore Changi Airport                         |
| AMS                 | NL                        | Amsterdam Airport Schiphol                       |
| PVG                 | CN                        | Shanghai Pudong International Airport            |
| PHX                 | US                        | Phoenix Sky Harbor International Airport         |
| CAN                 | CN                        | Guangzhou Baiyun International Airport           |
| LAS                 | US                        | McCarran International Airport                   |

b) Non-hubs

| <b>Airport Code</b> | <b>Country (ISO Code)</b> | <b>Airport Name</b> |
|---------------------|---------------------------|---------------------|
|---------------------|---------------------------|---------------------|

|     |    |                                                                             |
|-----|----|-----------------------------------------------------------------------------|
| DXB | AE | Dubai International Airport                                                 |
| BKK | TH | Suvarnabhumi Airport                                                        |
| CGK | ID | Soekarno-Hatta International Airport                                        |
| IST | TR | Istanbul Atatürk International Airport                                      |
| MNL | PH | Ninoy Aquino International Airport                                          |
| GRU | BR | São Paulo/Guarulhos - Governador André Franco Montoro International Airport |
| KMG | CN | Kunming Changshui International Airport                                     |
| BNE | AU | Brisbane International Airport                                              |
| JED | SA | King Abdulaziz International Airport                                        |
| DOH | QA | Hamad International Airport                                                 |
| XIY | CN | Xi'an Xianyang International Airport                                        |
| CGH | BR | Congonhas Airport                                                           |
| BOG | CO | El Dorado International Airport                                             |
| CTS | JP | New Chitose Airport                                                         |
| PMI | ES | Palma De Mallorca Airport                                                   |
| SGN | VN | Tan Son Nhat International Airport                                          |
| BSB | BR | Brasília Presidente Juscelino Kubistschek International Airport             |
| OKA | JP | Naha Airport                                                                |
| LIS | PT | Lisbon Portela Airport                                                      |
| GIG | BR | Rio de Janeiro/Galeão, Antonio Carlos Jobim International Airport           |

## C2. Probability of hubs across distances

In this section, we explore the likelihood of two locations connected by nonstop flights both being innovation hubs. First, note that the frequency of hub-to-hub connections changes with the distance between the two airports. The figure below shows a local polynomial regression of the probability of a hub-to-hub connection on distance with 95% confidence intervals. Thus, each point on the solid line denotes the fraction of flights that connect two airports in innovation hubs, for a given distance. We see that longer flights tend to be between two airports both located in innovation hubs. We detail the implications below.

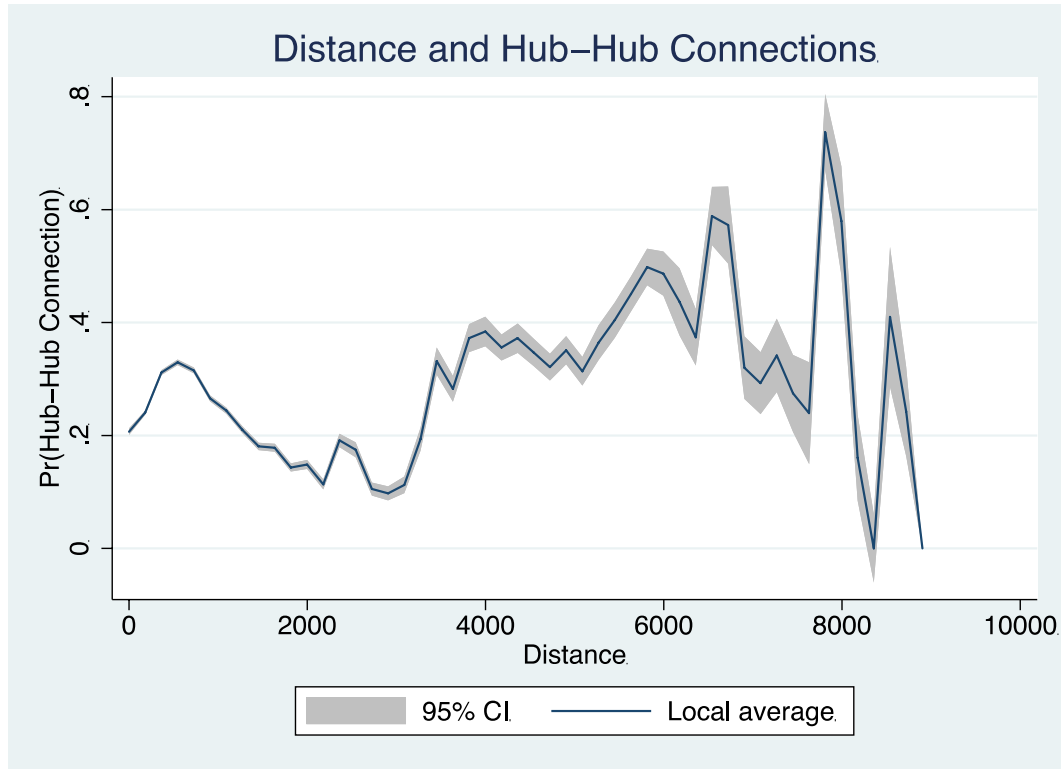

**Figure C1.** Probability of hub-to-hub connections

Local polynomial regression of the probability of a hub-to-hub connection against distance between airports.

Since hub-to-hub connections are more likely for airport pairs that are farther apart, we cannot distinguish between two mechanisms for the increase in innovation through nonstop flights. It is possible, for instance, that there are not enough ideas in non-hub locations, and thus is less knowledge spillovers. In contrast, it is also possible that nonstop flights tend to occur when both locations are innovation hubs, and we are capturing this effect indirectly.

### C3. Innovation hubs and distance

In the main text, we see distance and innovation are positively correlated for airport routes that are more than 6000 miles apart, which is unexpected. However, a manual inspection of the airport pairs that have high innovation and are far apart shows these are likely driven by city pairs like Singapore-Newark, Singapore-Los Angeles, New York-Bangkok, Sydney-Dallas, Atlanta-Bombay, and so forth. These outliers in part drive the positive relationship between distance and innovations in our sample.<sup>12</sup> This relationship, however, is not present for shorter flights.

This section tests whether dropping routes with high levels of measured collaborations and citations impacts our results on travel duration and innovation. We repeat our analysis after dropping the top 10% of routes with most collaborations/citations. We see that increased travel duration is negatively correlated with innovation outcomes, especially for long-distance flights. Price, on the other hand, is mostly insignificant.

**Table C2.** Effects of flight duration and flight price on knowledge diffusion (without outliers).

|                     | (1)                  | (2)                       | (3)                  | (4)                       |
|---------------------|----------------------|---------------------------|----------------------|---------------------------|
|                     | Below 6000           |                           | Above 6000           |                           |
|                     | Citations<br>(asinh) | Collaborations<br>(asinh) | Citations<br>(asinh) | Collaborations<br>(asinh) |
| Duration<br>(asinh) | -0.298<br>(0.193)    | -0.444**<br>(0.188)       | -0.937**<br>(0.408)  | -0.684**<br>(0.302)       |
| Price (asinh)       | -0.210**<br>(0.089)  | -0.044<br>(0.062)         | -0.188<br>(0.197)    | 0.211<br>(0.181)          |
| Distance<br>(asinh) | 0.104<br>(0.599)     | -0.201<br>(0.611)         | 2.368***<br>(0.866)  | 1.952***<br>(0.659)       |
| Constant            | 2.167<br>(5.233)     | 3.886<br>(5.328)          | -15.670**<br>(7.563) | -16.183**<br>(6.744)      |
| Observations        | 477                  | 512                       | 317                  | 417                       |
| R <sup>2</sup>      | 0.737                | 0.610                     | 0.807                | 0.581                     |

*Note:* Standard errors in parentheses, clustered at the country pair level. Outliers are defined as airport pairs with citations and collaborations above the 90% percentile. Inverse hyperbolic sine transformed variables are denoted with “asinh”.

\*  $p < 0.10$ , \*\*  $p < 0.05$ , \*\*\*  $p < 0.01$

We also plot this relationship using coefficient plots in the figure below.

<sup>12</sup> In section C3, we drop outlier routes (top 10%) that have very high levels of innovation. We see that the negative relationship between duration and collaboration/citations still hold, while the size of the coefficient on distance decreases. Price coefficients are mostly insignificant, but cheaper flights may increase citations in shorter flights.

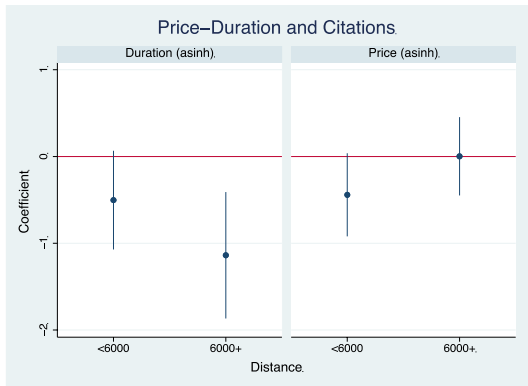

(a) Coefficient plot of Duration and Price on Citations

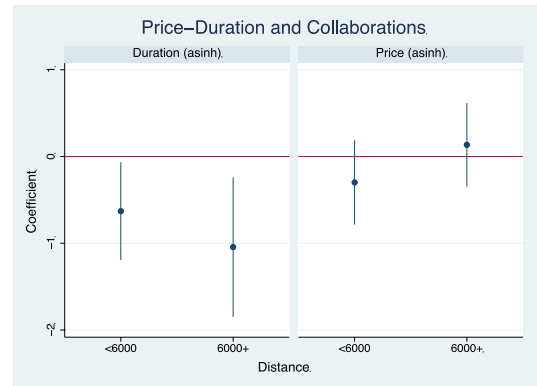

(b) Coefficient plot of Duration and Price on Collaborations

**Figure C2.** Coefficients plots of flight duration and flight price on citations and collaborations

Association between price and duration on citations/collaborations changes with the distance. Each point on this graph is the coefficient for either Duration or Price from estimating equation (5) above for two subsamples. Subsamples are chosen based on how far apart airports are (i.e., less than or greater than 6000 miles apart). Vertical lines indicate 95% confidence intervals. All regressions include country-country fixed effects. Standard errors clustered at the country-country level.

## C4. Hub to hub vs non-hub to hub

**Table C3.** Hub analysis further broken down into hub-hub, non-hub-non-hub, and non-hub-hub.

|                            | Citations           |                                                 |                        | Collaborations      |                                                 |                        |
|----------------------------|---------------------|-------------------------------------------------|------------------------|---------------------|-------------------------------------------------|------------------------|
|                            | (1)<br>Hub-Hub      | (2)<br>Non-hub-<br>Hub  <br>Non-hub-<br>Non-hub | (3)<br>Non-hub-<br>Hub | (4)<br>Hub-Hub      | (5)<br>Non-hub-<br>Hub  <br>Non-hub-<br>Non-hub | (6)<br>Non-hub-<br>Hub |
| Nonstop<br>Flights (asinh) | 0.532***<br>(0.180) | -0.045<br>(0.032)                               | -0.062<br>(0.047)      | 0.260***<br>(0.092) | 0.051<br>(0.036)                                | 0.076<br>(0.057)       |
| dist6000                   | -0.003**<br>(0.001) | -0.000<br>(0.000)                               | -0.000<br>(0.000)      | -0.001<br>(0.001)   | -0.000<br>(0.000)                               | -0.000<br>(0.000)      |
| dist6000 #<br>under6000    | 0.006**<br>(0.003)  | 0.000**<br>(0.000)                              | 0.000**<br>(0.000)     | 0.003*<br>(0.002)   | 0.000<br>(0.000)                                | 0.000<br>(0.000)       |
| Observations               | 1870                | 1760                                            | 1606                   | 1870                | 1760                                            | 1606                   |

*Note:* Standard errors in parentheses, clustered at the country-pair-year level. All specifications include country-pair-year fixed effects. Bandwidth at 550 miles. Hub denotes whether an airport is within a 50-mile radius of innovation hubs as defined in Bikard and Marx (2020). Both dependent variables are asinh-transformed.

\*  $p < 0.10$ , \*\*  $p < 0.05$ , \*\*\*  $p < 0.01$

## C5. Leaders and followers

To differentiate between firms in innovation-leading countries (“leaders”) and those in innovation-following countries (“followers”), we borrow from Furman and Hayes’s 2004 Research Policy paper, which contains a list of countries that are categorized as leaders and followers based on their historical innovative productivity and advancement. Table 6 from Furman and Hayes (2004) contains the list of countries. This categorization sets precedence for measuring leaders versus followers and lends confidence to our analysis.

Leading innovating countries include the following: Germany, Japan, Sweden, Switzerland, and the United States. Firms and inventors in these countries are categorized as “leaders” in our analysis. Further, we categorize firms and inventors in the other countries in Furman & Hayes (2004) (*middle tier, third tier, and emerging innovators*) are categorized as “followers”. Then, we restrict the sample to citations and collaborations by firms located in these leader and follower countries and conduct an analysis to gauge flights effects on citations and collaborations that occur 1) between leaders and 2) between a leader and a follower.

## C6. Firm-level variables

In addition to R&D spending, which is used to measure firm-level innovation mass in the paper, we also have two additional firm-level measures for innovation mass: firm revenue and number of employees. The table below shows the split-sample analysis using these three variables.

**Table C4.** Firms with greater innovation mass benefit more from nonstop flights. (Collaborations)

| Dep. Var.:<br>Collaborations<br>(asinh) | Revenue             |                     | Employees           |                     | R&D<br>Spending     |                     |
|-----------------------------------------|---------------------|---------------------|---------------------|---------------------|---------------------|---------------------|
|                                         | (1)<br>High         | (2)<br>Low          | (3)<br>High         | (4)<br>Low          | (5)<br>High         | (6)<br>Low          |
| Nonstop<br>Flights (asinh)              | 0.086***<br>(0.028) | 0.041<br>(0.027)    | 0.068***<br>(0.025) | 0.053*<br>(0.028)   | 0.093***<br>(0.030) | 0.031<br>(0.028)    |
| dist6000                                | -0.000<br>(0.000)   | -0.000**<br>(0.000) | -0.000<br>(0.000)   | -0.000**<br>(0.000) | -0.000*<br>(0.000)  | -0.000**<br>(0.000) |
| dist6000 #<br>under6000                 | 0.000<br>(0.000)    | 0.000*<br>(0.000)   | -0.000<br>(0.000)   | 0.001**<br>(0.000)  | 0.000<br>(0.000)    | 0.000*<br>(0.000)   |
| Observations                            | 3795                | 3795                | 3795                | 3795                | 3795                | 3795                |

Note: Standard errors in parentheses, clustered at the country-pair-year level. All specifications include country-pair-year fixed effects. Bandwidth is 550 miles. Revenue, Employees, and R&D spending obtained from the Duke DISCERN database. “High” refers to above median firms in each mass category, while “Low” refers to below median. To generate this table, we use the Duke DISCERN dataset to match the assignees in our sample to Compustat firms. We use this Compustat matched data to categorize firms into large or small based on their revenue, R&D expenditure, and employee counts. Finally, we categorize assignees into large or small based on the number of publications and inventors. We present these results later in this response letter.

\*  $p < 0.10$ , \*\*  $p < 0.05$ , \*\*\*  $p < 0.01$

**Table C5.** Firms with more innovation mass benefit more from nonstop flights. (Citations)

| Dep. Var.:<br>Citations<br>(asinh) | Revenue              |                      | Employees            |                      | R&D<br>Spending      |                      |
|------------------------------------|----------------------|----------------------|----------------------|----------------------|----------------------|----------------------|
|                                    | (1)<br>High          | (2)<br>Low           | (3)<br>High          | (4)<br>Low           | (5)<br>High          | (6)<br>Low           |
| Nonstop<br>Flights (asinh)         | 0.197***<br>(0.053)  | 0.186***<br>(0.056)  | 0.197***<br>(0.053)  | 0.174***<br>(0.054)  | 0.180***<br>(0.052)  | 0.187***<br>(0.054)  |
| dist6000                           | -0.001***<br>(0.000) | -0.001***<br>(0.000) | -0.001***<br>(0.000) | -0.001***<br>(0.000) | -0.001***<br>(0.000) | -0.001***<br>(0.000) |
| dist6000 #<br>under6000            | 0.001***<br>(0.000)  | 0.001***<br>(0.001)  | 0.001***<br>(0.000)  | 0.001***<br>(0.001)  | 0.001***<br>(0.000)  | 0.001***<br>(0.000)  |
| Observations                       | 3795                 | 3795                 | 3795                 | 3795                 | 3795                 | 3795                 |

Note: Standard errors in parentheses, clustered at the country-pair-year level. All specifications include country-pair-year fixed effects. Bandwidth is 550 miles. Revenue, Employees, and R&D spending obtained from the Duke DISCERN database. "High" refers to above median firms in each mass category, while "Low" refers to below median. To generate this table, we use the Duke DISCERN dataset to match the assignees in our sample to Compustat firms. We use this Compustat matched data to categorize firms into large or small based on their revenue, R&D expenditure, and employee counts. Finally, we categorize assignees into large or small based on the number of publications and inventors.

\*  $p < 0.10$ , \*\*  $p < 0.05$ , \*\*\*  $p < 0.01$

## Appendix D. Distances

### D1. Temporal distance

We test whether our results on temporal distance are robust to varying the threshold for temporal distance. Our main measure of temporal distance was business hour overlap, obtained using the *timezonefinder* package in Python. We first obtained each airport’s time zones, then for each pair of airports we calculate the time zone difference (in hours) between the two. The average time zone difference across all routes is -0.011 hours (st. dev. 2.25), with AKL-LAX and HNL-MEL having time zones farthest apart. These airport pairs, however large their time zone difference is, will still have some working hour overlap, (3 hours, since 9AM in AKL is 2PM in LAX). Thus, we convert the time zone difference to “business hour overlap” (0-8 hours), as well as “time difference” (0-12 hours). For “time difference,” we take the absolute value of time zone difference, and subtract it from 24 if time zone difference is 12+ hours. For “business hour overlap,” we subtract “time difference” from 8, but set all negative values to 0. Some routes with large “time difference” are between LA and Moscow, which have zero business hour overlap. Routes such as Munich and Singapore have 1 business hour overlap, but are 7 hours apart. In the paper, we use the median business hour overlap to categorize airport pairs into high or low temporal distance routes.

In this section, we relax this assumption and use alternate cutoffs to bin routes into high or low temporal routes. Below, in Tables D1 through D5, we present regression discontinuity results from our two subsamples, low temporal distance and high temporal distance, based on the number of hours of business overlap. For each alternative threshold, we see that the effects are driven by airport pairs with high temporal distance (low business hour overlap).

**Table D1.** High temporal distance corresponds to >0 hours in business hour overlap.

|                           | Citations            |                   | Collaborations      |                   |
|---------------------------|----------------------|-------------------|---------------------|-------------------|
|                           | (1)<br>Low           | (2)<br>High       | (3)<br>Low          | (4)<br>High       |
| Business Hour<br>Overlap: |                      |                   |                     |                   |
| asinh(Flights)            | 0.277***<br>(0.087)  | 0.828<br>(0.980)  | 0.242***<br>(0.082) | 0.279<br>(0.211)  |
| dist6000                  | 0.003***<br>(0.001)  | -0.009<br>(0.010) | -0.000<br>(0.000)   | -0.002<br>(0.001) |
| dist6000 # under6000      | -0.007***<br>(0.002) | 0.010<br>(0.010)  | -0.001<br>(0.001)   | 0.002<br>(0.001)  |
| Observations              | 828                  | 1450              | 1101                | 2002              |

*Note:* Standard errors in parentheses, clustered at the Country pair-year level. All specifications include country-pair-year fixed effects. Dependent variables are inverse hyperbolic sine transformed. Optimal bandwidth calculation follows the methodology described in Cattaneo et al. (2018). Working hour overlap calculated from airport time zone data. Low working hour overlap indicates 0 working hour overlap while high working hour overlap indicates any business hour overlap. \*  $p < 0.10$ , \*\*  $p < 0.05$ , \*\*\*  $p < 0.01$ .

**Table D2.** High temporal distance corresponds to >1 hours in business hour overlap.

|                           | Citations  |             | Collaborations |             |
|---------------------------|------------|-------------|----------------|-------------|
|                           | (1)<br>Low | (2)<br>High | (3)<br>Low     | (4)<br>High |
| Business Hour<br>Overlap: |            |             |                |             |
| asinh(Flights)            | 0.368***   | -0.127      | 0.201***       | 0.133       |

|                      |         |         |         |         |
|----------------------|---------|---------|---------|---------|
|                      | (0.077) | (0.126) | (0.057) | (0.214) |
| dist6000             | 0.001   | 0.003*  | 0.000   | -0.001  |
|                      | (0.001) | (0.002) | (0.000) | (0.002) |
| dist6000 # under6000 | -0.001  | -0.003* | -0.000  | 0.001   |
|                      | (0.002) | (0.002) | (0.001) | (0.002) |
| Observations         | 1342    | 990     | 1859    | 1287    |

*Note:* Standard errors in parentheses, clustered at the Country pair-year level. All specifications include country-pair-year fixed effects. Dependent variables are inverse hyperbolic sine transformed. Optimal bandwidth calculation follows the methodology described in Cattaneo et al. (2018). Working hour overlap calculated from airport time zone data. Low working hour overlap indicates 0-1 hours of overlap while High working hour overlap indicates greater than 1 hour of business hour overlap. \*  $p < 0.10$ , \*\*  $p < 0.05$ , \*\*\*  $p < 0.01$ .

**Table D3.** High temporal distance corresponds to >2 hours in business hour overlap.

|                           | Citations  |             | Collaborations |             |
|---------------------------|------------|-------------|----------------|-------------|
|                           | (1)<br>Low | (2)<br>High | (3)<br>Low     | (4)<br>High |
| Business Hour<br>Overlap: |            |             |                |             |
| asinh(Flights)            | 0.392***   | -0.096      | 0.220***       | 0.080       |
|                           | (0.083)    | (0.075)     | (0.066)        | (0.096)     |
| dist6000                  | 0.001      | 0.003**     | 0.000          | -0.001      |
|                           | (0.001)    | (0.001)     | (0.000)        | (0.001)     |
| dist6000 # under6000      | -0.001     | -0.003**    | -0.000         | 0.001       |
|                           | (0.002)    | (0.001)     | (0.001)        | (0.001)     |
| Observations              | 1595       | 737         | 2222           | 923         |

*Note:* Standard errors in parentheses, clustered at the Country pair-year level. All specifications include country-pair-year fixed effects. Dependent variables are inverse hyperbolic sine transformed. Optimal bandwidth calculation follows the methodology described in Cattaneo et al. (2018). Working hour overlap calculated from airport time zone data. Low working hour overlap indicates 0-2 hours of overlap while High working hour overlap indicates greater than 2 hours of business hour overlap. \*  $p < 0.10$ , \*\*  $p < 0.05$ , \*\*\*  $p < 0.01$ .

**Table D4.** High temporal distance corresponds to >3 hours in business hour overlap.

|                           | Citations  |             | Collaborations |             |
|---------------------------|------------|-------------|----------------|-------------|
|                           | (1)<br>Low | (2)<br>High | (3)<br>Low     | (4)<br>High |
| Business Hour<br>Overlap: |            |             |                |             |
| asinh(Flights)            | 0.299***   | 0.481       | 0.159***       | -0.111      |
|                           | (0.060)    | (1.185)     | (0.045)        | (0.121)     |
| dist6000                  | 0.001      | -0.005      | 0.000          | 0.002       |
|                           | (0.001)    | (0.017)     | (0.000)        | (0.002)     |
| dist6000 # under6000      | -0.001     | 0.006       | -0.000         | -0.002      |
|                           | (0.001)    | (0.020)     | (0.001)        | (0.002)     |
| Observations              | 1712       | 620         | 2367           | 768         |

*Note:* Standard errors in parentheses, clustered at the Country pair-year level. All specifications include country-pair-year fixed effects. Dependent variables are inverse hyperbolic sine transformed. Optimal bandwidth calculation follows the methodology described in Cattaneo et al. (2018). Working hour overlap calculated from airport time zone data. Low working hour overlap indicates 0-3 hours of overlap while High working hour overlap indicates greater than 3 hours of business hour overlap. \*  $p < 0.10$ , \*\*  $p < 0.05$ , \*\*\*  $p < 0.01$ .

**Table D5.** High temporal distance corresponds to >4 hours in business hour overlap.

| Business Hour<br>Overlap: | Citations                       |                   | Collaborations                  |                   |
|---------------------------|---------------------------------|-------------------|---------------------------------|-------------------|
|                           | (1)<br>Low                      | (2)<br>High       | (3)<br>Low                      | (4)<br>High       |
| asinh(Flights)            | 0.292 <sup>***</sup><br>(0.060) | 0.276<br>(0.457)  | 0.150 <sup>***</sup><br>(0.044) | -0.130<br>(0.138) |
| dist6000                  | 0.001<br>(0.001)                | -0.004<br>(0.006) | -0.000<br>(0.000)               | 0.002<br>(0.002)  |
| dist6000 # under6000      | -0.001<br>(0.001)               | 0.004<br>(0.007)  | -0.000<br>(0.001)               | -0.002<br>(0.002) |
| Observations              | 1848                            | 484               | 2576                            | 561               |

*Note:* Standard errors in parentheses, clustered at the Country pair-year level. All specifications include country-pair-year fixed effects. Dependent variables are asinh-transformed. Optimal bandwidth calculation follows the methodology described in Cattaneo et al. (2018). Working hour overlap calculated from airport time zone data. Low working hour overlap indicates 0-4 hours of overlap while High working hour overlap indicates greater than 4 hours of business hour overlap. \*  $p < 0.10$ , \*\*  $p < 0.05$ , \*\*\*  $p < 0.01$ .

## D2. North-South analysis

**Table D6.** Flight effects on knowledge diffusion are greater for shorter North-South distances.

|                            | Citations                                      |                                                | Collaborations                                 |                                                |
|----------------------------|------------------------------------------------|------------------------------------------------|------------------------------------------------|------------------------------------------------|
|                            | (1)<br>Above median<br>North-South<br>distance | (2)<br>Below median<br>North-South<br>distance | (3)<br>Above median<br>North-South<br>distance | (4)<br>Below median<br>North-South<br>distance |
| Nonstop Flights<br>(asinh) | -0.078                                         | 0.599***                                       | 0.089                                          | 0.208**                                        |
|                            | (0.079)                                        | (0.138)                                        | (0.094)                                        | (0.063)                                        |
| dist6000                   | 0.001**                                        | -0.001                                         | -0.001                                         | 0.000                                          |
|                            | (0.001)                                        | (0.001)                                        | (0.001)                                        | (0.000)                                        |
| dist6000 # under6000       | -0.001*                                        | 0.001                                          | 0.001                                          | 0.000                                          |
|                            | (0.001)                                        | (0.001)                                        | (0.001)                                        | (0.001)                                        |
| Observations               | 1430                                           | 1815                                           | 1430                                           | 1815                                           |
| R <sup>2</sup>             | 0.339                                          | 0.028                                          | 0.099                                          | 0.413                                          |

Note: Standard errors in parentheses, clustered at the country-pair-year level. All specifications include country-pair-year fixed effects. Bandwidth at 500 miles. Both dependent variables are asinh-transformed. In this table, we study the differences between North-South routes (e.g., London - Johannesburg) and East-West routes (e.g., Los Angeles - Singapore) that cross many more time zones. To do this analysis, we calculate the difference in longitudes between airport pairs and run subsample analyses on above and below median longitudinal distance pairs. Some examples of routes that are slightly above the median North-South distance is London Gatwick-Hong Kong, or Nagoya-Charles DeGaulle. Routes that are slightly below the median are London Heathrow-Capetown, or Saigon-Frankfurt.

\*  $p < 0.10$ , \*\*  $p < 0.05$ , \*\*\*  $p < 0.01$

### D3. Nonlinear effects

**Table D7.** Nonlinear effects of temporal distance, by percentile.

|                               | Citations            |              |              |                   | Collaborations       |              |              |                   |
|-------------------------------|----------------------|--------------|--------------|-------------------|----------------------|--------------|--------------|-------------------|
|                               | (1)<br>Bottom<br>25% | (2)<br>25-50 | (3)<br>50-75 | (4)<br>Top<br>25% | (5)<br>Bottom<br>25% | (6)<br>25-50 | (7)<br>50-75 | (8)<br>Top<br>25% |
| Nonstop<br>Flights<br>(asinh) | 0.333                | 0.018        | 0.683***     | 0.420***          | -0.176               | -0.000       | 0.217**      | 0.215***          |
|                               | (0.503)              | (0.026)      | (0.239)      | (0.127)           | (0.248)              | (0.006)      | (0.095)      | (0.064)           |
| dist6000                      | -0.003               | -0.000       | -0.004*      | 0.000             | 0.002                | -0.000**     | -0.001       | -0.000            |
|                               | (0.006)              | (0.000)      | (0.002)      | (0.001)           | (0.003)              | (0.000)      | (0.001)      | (0.000)           |
| dist6000 #<br>under6000       | 0.004                | 0.001**      | 0.006**      | -0.001            | -0.003               | 0.000        | 0.003**      | -0.000            |
|                               | (0.008)              | (0.000)      | (0.003)      | (0.001)           | (0.004)              | (0.000)      | (0.001)      | (0.001)           |
| Observations                  | 892                  | 585          | 847          | 1398              | 892                  | 585          | 847          | 1398              |

*Note:* Standard errors in parentheses, clustered at the country-pair-year level. All specifications include country-pair-year fixed effects. Bandwidth at 550 miles. Both dependent variables are asinh-transformed. Time zone distance measures the difference in time zones between airport pairs with a maximum of 12 hours and a minimum of 0 hours. In this table, we split airport pairs into quartiles based on the temporal distance. Bottom 25% corresponds to flights less than 6 hours, 25-50% lists flights greater than 6 hours but less than 7 hours long, 50-75% are flights less than 9 hours but greater than or equal to 7 hours, and the top 25% are flights 9 hours or longer.

\*  $p < 0.10$ , \*\*  $p < 0.05$ , \*\*\*  $p < 0.01$

**Table D8.** Nonlinear effects of temporal distance, by number of hours in time zone difference.

|                                  | Citations          |                     |                     |                    | Collaborations     |                     |                     |                    |
|----------------------------------|--------------------|---------------------|---------------------|--------------------|--------------------|---------------------|---------------------|--------------------|
|                                  | (1)<br><4<br>Hours | (2)<br>4-6<br>Hours | (3)<br>6-8<br>Hours | (4)<br>8+<br>Hours | (5)<br><4<br>Hours | (6)<br>4-6<br>Hours | (7)<br>6-8<br>Hours | (8)<br>8+<br>Hours |
| Nonstop flights<br>(asinh)       | 0.280              | 0.051               | 1.196*              | 0.420***           | -0.177             | 0.000               | 0.378               | 0.215***           |
|                                  | (0.375)            | (0.032)             | (0.644)             | (0.127)            | (0.217)            | (0.005)             | (0.230)             | (0.064)            |
| (6,000-Distance)                 | -0.003             | 0.000               | -0.005              | 0.000              | 0.002              | -0.000              | -0.001              | -0.000             |
|                                  | (0.005)            | (0.000)             | (0.003)             | (0.001)            | (0.003)            | (0.000)             | (0.001)             | (0.000)            |
| (6,000-Distance) x<br>Under6,000 | 0.005              | 0.001               | 0.006*              | -0.001             | -0.003             | -0.000              | 0.003*              | -0.000             |
|                                  | (0.007)            | (0.001)             | (0.003)             | (0.001)            | (0.004)            | (0.000)             | (0.001)             | (0.001)            |
| Observations                     | 637                | 398                 | 1309                | 1398               | 637                | 398                 | 1309                | 1398               |

*Note:* Standard errors in parentheses, clustered at the country-pair-year level. All specifications include country-pair-year fixed effects. Bandwidth at 550 miles. Both dependent variables are asinh-transformed. Time zone distance measures the difference in time zones between airport pairs with a maximum of 12 hours and a minimum of 0 hours. In this table, we split airport pairs roughly into quartiles based on the temporal distance. <4 Hours corresponds to the bottom 15% of the sample, 4-6 hours correspond to about 12% of the sample, 6-8 hours correspond to about 41% of the sample, and 8 hours or more corresponds to the top 31% of the sample.

\*  $p < 0.10$ , \*\*  $p < 0.05$ , \*\*\*  $p < 0.01$

**Table D9.** Nonlinear effects of cultural distance.

|         | Citations            |              |              |                   | Collaborations       |              |              |                   |
|---------|----------------------|--------------|--------------|-------------------|----------------------|--------------|--------------|-------------------|
|         | (1)<br>Bottom<br>25% | (2)<br>25-50 | (3)<br>50-75 | (4)<br>Top<br>25% | (5)<br>Bottom<br>25% | (6)<br>25-50 | (7)<br>50-75 | (8)<br>Top<br>25% |
| Nonstop | 0.246                | -0.039       | -0.273       | 1.169**           | 0.004                | -0.126       | -0.169       | 0.416*            |

|                         |         |         |         |         |          |         |          |         |
|-------------------------|---------|---------|---------|---------|----------|---------|----------|---------|
| Flights (asinh)         |         |         |         |         |          |         |          |         |
|                         | (0.292) | (0.157) | (0.211) | (0.553) | (0.039)  | (0.130) | (0.111)  | (0.211) |
| dist6000                | 0.000   | 0.001   | 0.002   | -0.004* | -0.000** | 0.001   | 0.001**  | -0.000  |
|                         | (0.001) | (0.001) | (0.001) | (0.002) | (0.000)  | (0.001) | (0.001)  | (0.001) |
| dist6000 #<br>under6000 | -0.001  | -0.002  | -0.002  | 0.011** | 0.000    | -0.001  | -0.002** | 0.002   |
|                         | (0.002) | (0.001) | (0.002) | (0.005) | (0.000)  | (0.001) | (0.001)  | (0.002) |
| Observations            | 494     | 511     | 467     | 526     | 494      | 511     | 467      | 526     |

*Note:* Standard errors in parentheses, clustered at the country-pair-year level. All specifications include country-pair-year fixed effects. Bandwidth at 550 miles. Both dependent variables are asinh-transformed. Cultural distance measures are derived from Berry et. al., (2020).

\*  $p < 0.10$ , \*\*  $p < 0.05$ , \*\*\*  $p < 0.01$

## D4. Immigrant Employees

**Table D10.** Flight effects on knowledge diffusion are greater for firms with more immigrant employees.

|                            | Citations            |                      | Collaborations       |                     |
|----------------------------|----------------------|----------------------|----------------------|---------------------|
|                            | (1)<br>High          | (2)<br>Low           | (3)<br>High          | (4)<br>Low          |
| Nonstop Flights<br>(asinh) | 0.208***<br>(0.059)  | 0.073***<br>(0.027)  | 0.111***<br>(0.034)  | -0.000<br>(0.014)   |
| dist6000                   | -0.001***<br>(0.000) | -0.001***<br>(0.000) | -0.000***<br>(0.000) | -0.000**<br>(0.000) |
| dist6000 # under6000       | 0.002***<br>(0.001)  | 0.001***<br>(0.000)  | 0.001**<br>(0.000)   | 0.000<br>(0.000)    |
| Observations               | 3795                 | 3795                 | 3795                 | 3795                |

*Note:* Standard errors in parentheses, clustered at the country-pair-year level. All specifications include country-pair-year fixed effects. Both dependent variables are asinh-transformed. This table matches each firm to the number of labor condition applications (LCAs) they have submitted between the years 2008-2021. The number of LCAs approximates a firm's dependence on immigrants as a central part of their workforce. In the context of innovative firms, this likely means a higher number of immigrant inventors and business people. Depending on the number of LCAs, we categorize them into "High" LCA dependent firms and "Low" LCA dependent firms. Roughly one third of the sample are matched to the LCA dataset.

\*  $p < 0.10$ , \*\*  $p < 0.05$ , \*\*\*  $p < 0.01$

## Appendix E. Subgroup Analysis

In our broader research paper, there are two types of heterogeneity we try to uncover. The first is heterogeneity across different subsamples. For instance, testing whether the effect of nonstop flights is greater for airport pairs that are temporally distant. This would involve estimating regression discontinuities for two different subsamples: airport pairs with high temporal distance and another for low temporal distance and properly comparing the point estimates. A second type of heterogeneity we consider is heterogeneity across different outcome variables. For instance, to test whether the effect of flights is greater for firms, we estimate two regression discontinuities, both using the entire sample of airport pairs, but with different outcome variables: one outcome for firms and another for academics. We detail how to test for these two types of heterogeneity below.

Subgroup analysis of treatment effects in the RDD setting can be performed by modelling the effects of flights for each subsample. Specifically, we follow Wasserman (2021) and estimate the following regression specification using 2SLS:

$$\begin{aligned}
 Y_{a_o, a_d, t} = & \alpha_0 + \alpha_1 \widehat{nonstopFlights}_{a_o, a_d, t} + \alpha_2 (D_{a_o, a_d} \times \widehat{nonstopFlights}_{a_o, a_d, t}) + \alpha_3 D_{a_o, a_d} \\
 & + \alpha_4 \widehat{dist6000}_{a_o, a_d} + \alpha_5 \widehat{Under6000}_{a_o, a_d} \times \widehat{dist6000}_{a_o, a_d} \\
 & + \alpha_6 D_{a_o, a_d} \times \widehat{dist6000}_{a_o, a_d} + \alpha_7 D_{a_o, a_d} \times \widehat{Under6000}_{a_o, a_d} \times \widehat{dist6000}_{a_o, a_d} \\
 & + \varepsilon_{a_o, a_d, t}
 \end{aligned}$$

Here,  $D_{a_o, a_d} = 1$  if the airport pair  $a_o, a_d$  are in the subsample of interest (e.g., airport pairs with above median temporal distance). All other variables are identical to our baseline specification. Our main variable of interest is then  $\alpha_2$ , which denotes the differential effect of nonstop flights for group  $D_{a_o, a_d} = 1$ . We use 2SLS, using  $\widehat{Under6000}$  to instrument for  $\widehat{nonstopFlights}$ , and  $D \times \widehat{Under6000}$  to instrument for  $D \times \widehat{nonstopFlights}$ . As Wasserman (2021) and Hsu and Shen (2019) note, these estimates may lead to over-rejection. Thus, we use bootstrap resampling to estimate the variability of the estimates. We iteratively sample subsamples of our data with replacement, and run separate fuzzy RDD regressions for each subgroup to get instrumental variable estimates and standard errors of the group-specific effects.

The second test for heterogeneous effects involves comparing RD estimates for two different outcome variables. Here, we follow Mize et. al., (2019) in using Seemingly Unrelated Estimates (SUEST), as well as block bootstrapped estimates of the difference.

To test whether the effect of flights is different for academics vs firms, we follow Mize et. al., (2019) in using seemingly unrelated estimation (SUEST) to compare effect sizes. We compare the effects of the treatment on two separate outcomes by first, fitting a first-stage model to obtain “predicted” exposures for each unit. Then, we estimate separate second stage models for the two outcomes, while computing a cross-model covariance using the SUEST method. Testing cross-model difference can then be done using a Wald-like test or, alternatively, using a bootstrap method to simulate the distribution of the difference.

In practice, to test whether the effect of nonstop flights is different for firms and academics, we “stack” the data and fit the models simultaneously as in Mize et. al., (2019). Stacking allows us to estimate the covariance between the two estimates and adjust our test statistic. As the name stacking

suggests, if the length of our original dataset is  $N$ , the stacked dataset is exactly  $2N$  rows long. For columns, we create a stacked outcome variable,  $Y$ , of which the first  $N$  observations are the citation counts to academic patents, and the last  $N$  observations are the citation counts to firm patents. In addition to  $Y$ , we have a group of columns for observations regarding academic patents, and another group of columns for firm patents. For the academic columns, the first  $N$  rows replicate the original dataset variables  $\text{asinh}(\text{Nonstop Flights})$ ,  $\text{Dist6000}$ ,  $\text{Under6000}$ , and  $\text{Dist6000} \times \text{Under6000}$ , while the last  $N$  rows are zeroes. For firm columns, the last  $N$  rows replicate the original dataset variables  $\text{asinh}(\text{Nonstop Flights})$ ,  $\text{Dist6000}$ ,  $\text{Under6000}$ , and  $\text{Dist6000} \times \text{Under6000}$ , while the first  $N$  rows are zeroes. Thus, a roughly diagonal dataset is created as below:

| $Y$                 | $\text{Dist6000}_a$ | $\text{Under6000}_a$ | $\text{Dist6000}_f$ | $\text{Under6000}_f$ | <i>academic</i> |
|---------------------|---------------------|----------------------|---------------------|----------------------|-----------------|
| $\text{CiteAcad}_1$ | 948.3               | 1                    | 0                   | 0                    | 1               |
| $\vdots$            | $\vdots$            | $\vdots$             | $\vdots$            | $\vdots$             | $\vdots$        |
| $\text{CiteAcad}_N$ | 10139.4             | 0                    | 0                   | 0                    | 1               |
| $\text{CiteFirm}_1$ | 0                   | 0                    | 948.3               | 1                    | 0               |
| $\vdots$            | $\vdots$            | $\vdots$             | $\vdots$            | $\vdots$             | $\vdots$        |
| $\text{CiteFirm}_N$ | 0                   | 0                    | 10139.4             | 0                    | 0               |

Using the data structure as above, we estimate the following equation:

$$\begin{aligned}
Y = & \alpha_0 \widehat{\text{nonstopFlights}}_a + \alpha_1 \text{Dist6000}_a + \alpha_2 \text{Dist6000}_a \times \text{Under6000}_a \\
& + \beta_0 \widehat{\text{nonstopFlights}}_f + \beta_1 \text{Dist6000}_f + \beta_2 \text{Dist6000}_f \times \text{Under6000}_f \\
& + \gamma \text{Academic} + X_a^{FE} + X_f^{FE}
\end{aligned}$$

Here, the coefficients  $\alpha_0$  and  $\beta_0$  will recover the estimates from separately running RDD for academic and firm citations. Note, we include country-pair year fixed effects for academic as well as firms. Finally, SUEST involves running a Wald test for  $\alpha_0 = \beta_0$ . We present the results below.

The SUEST results show that nonstop flights are more beneficial for firms than for academics: for academic assignees' patents, a 10% increase in nonstop flights leads to a 0.99% increase in citations, but for firm patents, citations increase by 3.38%. The difference of 2.39 percentage points has  $z = 2.5813$  with a  $p$ -value of 0.010, thus we reject the null hypothesis that the effect of flights on academic and firm citations are equal. Below, we compare the SUEST results with our bootstrapping results.

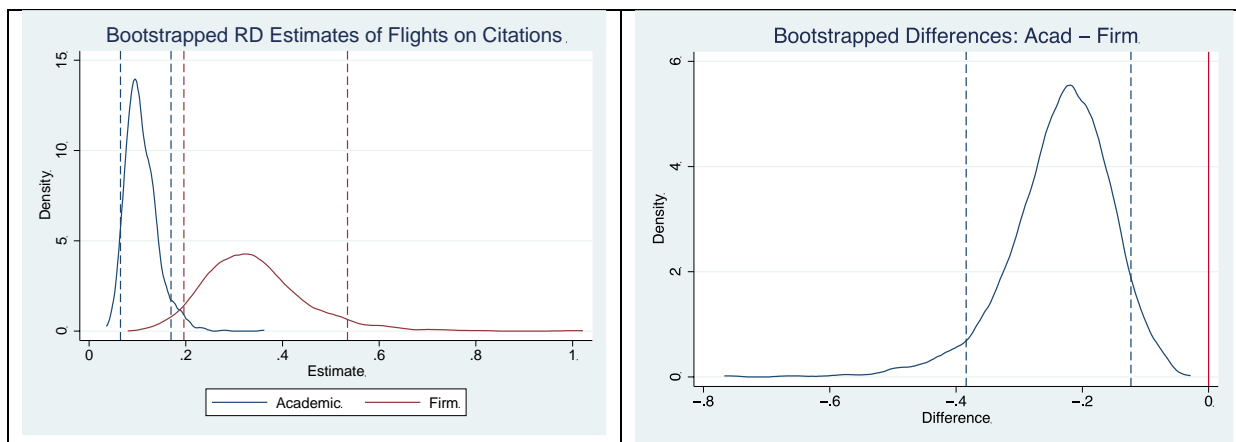

Above, on the left-hand side, we show the distribution of 1,000 bootstrapped estimates of the two effects. The right-hand side shows the distribution of the estimates of the difference in effects. The mean of the difference is 0.235, with a 95% confidence interval of [-0.384, -0.123]. We see that the bootstrap differences are indeed similar to the SUEST results, but with tighter confidence intervals for the bootstrapped results.

We repeat the analysis above for collaborations and similarly find that the effect of nonstop flights is greater for firms than for academics. For academic assignees' patents, a 10% increase in nonstop flights leads to a 0.404% increase in collaborations, while for firms the effect is 1.48%. The mean of the difference is 0.1003, with  $z = 2.035$ , and a p-value of 0.042. We thus reject the null hypothesis that the effect of flights on academic and firm collaborations are equal. Again, we compare our SUEST results with our bootstrap results.

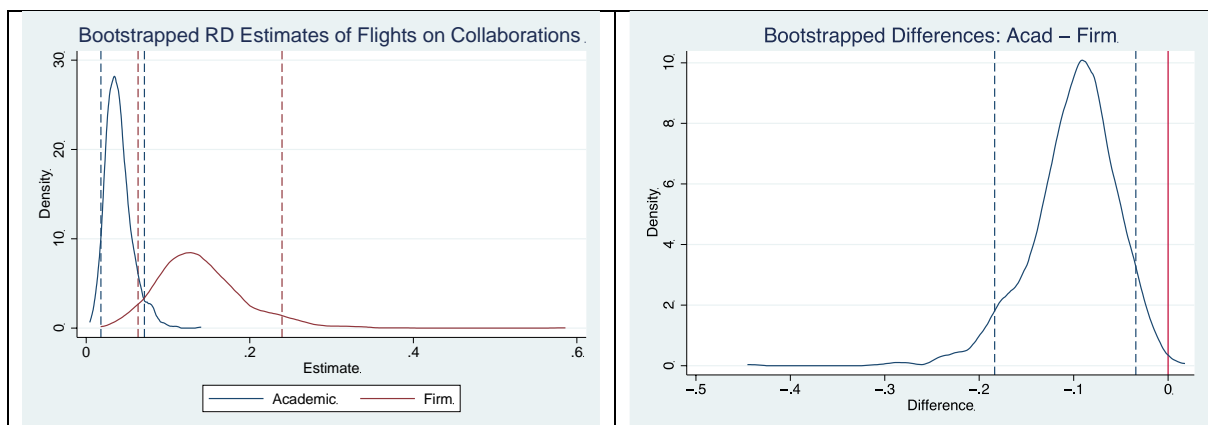

The left-hand side panel shows the distribution of 1,000 bootstrapped estimates of the two effects, while the right hand side panel plots the distribution of their differences. The mean of the difference is 0.1003, with a 95% confidence interval of [-0.184, -0.034]. Again, we see that the mean difference is very similar, with narrower confidence intervals.

## Appendix F. Airport level analysis and General Equilibrium concerns

This section provides additional details about estimating the impact of nonstop flights at the airport level, as well as ways to alleviate general equilibrium concerns.

### F1. Instrumental variable approach

First, we implemented an instrumental variable-based identification strategy proposed by Campante and Yanagizawa-Drott (2015) to extend the results from the airport-*pair* level to the airport level. While the RD shows that at the airport pair level, pairs slightly below 6000 miles apart have increased knowledge flows, whether this carries over to the airport level is unclear. This effect may be a redirection of knowledge flows from other airport pairs to the focal airport pair. Analyzing how nonstop flights affect collaborations and citations at a single airport mitigates concerns of redirection as it would be the net effect.

Our approach is to use an instrument to create exogenous variation on the number of nonstop flights linked to an airport. A corollary to our identification strategy (ultra-long-haul flights are more expensive to operate) is that airports with many other “potential” airports slightly less than 6000 miles apart will be more “connected” in terms of number of flights. The identification assumption is that there is no reason for airports that happen to have relatively many airports sitting just under 6,000 miles away should be systematically different from airports that happen to have many just above that threshold. This statement is conditional on the total number of airports around 6,000 miles not explaining changes in innovation outcomes other than through the number of flights themselves. Thus, we weight the instrument with the information related to the potential of each connection; specifically, we proxy each airport’s potential using its eigenvector centrality at the beginning of our sample (2005). We estimate the following equation for our first stage.

$$ConnectedAirports_{it} = \beta_0 + \beta_1 ShareBelow6K_i + X_i + \varepsilon_i$$

Here,  $ConnectedAirports_i$  measures the number of airports with which airport  $i$  has a nonstop flight in year  $t$ .  $ShareBelow6K_i$  counts the total number of airports (connected or unconnected) slightly below 6000 miles and divides this by the total number of airports (again, connected or unconnected) around 6000 miles. A positive  $\beta_1$  is evidence that the share of airports slightly below 6000 miles can predict the number of airports to which nonstop flights exist. We present results of estimating this equation below.

**Table F1.** First stage results in the instrumental variable analysis to gauge the flight effects on knowledge diffusion at the airport level.

|                                | (1)<br>Connected<br>airports, 2005 | (2)<br>Connected<br>airports, 2010 | (3)<br>Connected<br>airports, 2015 | (4)<br>Connected<br>airports, 2015 | (5)<br>Network<br>Centrality,<br>2005 | (6)<br>Network<br>Centrality,<br>2010 | (7)<br>Network<br>Centrality,<br>2015 | (8)<br>Network<br>Centrality,<br>2015 | (9)<br>Total # of<br>Connected<br>Airports<br>(2005-2015) |
|--------------------------------|------------------------------------|------------------------------------|------------------------------------|------------------------------------|---------------------------------------|---------------------------------------|---------------------------------------|---------------------------------------|-----------------------------------------------------------|
| sharebelow6k<br>(unweighted)   | 26.743**<br>(12.680)               | 29.610**<br>(14.525)               | 33.558**<br>(16.393)               | 37.026***<br>(11.528)              |                                       |                                       |                                       |                                       | 26.743**<br>(12.680)                                      |
| airportsnear6k<br>(unweighted) | -0.007<br>(0.008)                  | -0.003<br>(0.009)                  | -0.001<br>(0.010)                  | 0.003<br>(0.005)                   |                                       |                                       |                                       |                                       | -0.007<br>(0.008)                                         |
| dist_equator                   |                                    |                                    |                                    | -0.002<br>(0.002)                  |                                       |                                       |                                       | -0.000***<br>(0.000)                  |                                                           |
| gmt_timediff                   |                                    |                                    |                                    | -3.099**<br>(0.705)                |                                       |                                       |                                       | -0.001***<br>(0.000)                  |                                                           |
| sharebelow6k                   |                                    |                                    |                                    |                                    | 0.008***<br>(0.002)                   | 0.008***<br>(0.002)                   | 0.008***<br>(0.002)                   | 0.011***<br>(0.003)                   |                                                           |
| airportsnear6k                 |                                    |                                    |                                    |                                    | 0.000<br>(0.000)                      | 0.000<br>(0.000)                      | 0.000<br>(0.000)                      | 0.000<br>(0.000)                      |                                                           |
| Constant                       | 2.411<br>(10.890)                  | 0.263<br>(12.143)                  | -1.489<br>(13.890)                 | 14.700*<br>(8.707)                 | -0.000<br>(0.001)                     | -0.000<br>(0.001)                     | -0.000<br>(0.001)                     | 0.008***<br>(0.002)                   | 2.411<br>(10.890)                                         |
| Observations                   | 4956                               | 4956                               | 4956                               | 4956                               | 4956                                  | 4956                                  | 4956                                  | 4956                                  | 4956                                                      |

*Note:* Standard errors in parentheses, clustered at the country level. All specifications include region fixed effects. Sharebelow6k (unweighted) measures the fraction of airports within [5500,6000] miles over the number of airports within [5500,6500] miles. Sharebelow6k weights this measure by that airport’s network centrality in 2005.

\*  $p < 0.10$ , \*\*  $p < 0.05$ , \*\*\*  $p < 0.01$

Our first stage results show that the unweighted instrument *ShareBelow6K* is a good predictor of the number of connected airports in 2005, 2010, and 2015. We include geographic controls such as the distance to the equator and the time difference from GMT in Columns 4, 8 and 9. as well as the eigenvector centrality between 2005-2015. A one standard deviation increase in the unweighted share of airports below 6000 miles (0.084) increases the number of connected airports in 2015 by about 3.11. Similarly, a one standard deviation increase in the weighted share of airports below 6000 miles (0.144) increases network centrality by 0.002.

Next, we turn to estimating the impact of flights on publications and citations at the airport level. We estimate the following equation.

$$PatentPublications_i = \beta_0 + \beta_1 \widehat{ConnectedAirports}_i + X_i + \varepsilon_i$$

Where  $\widehat{ConnectedAirports}_i$  is the predicted value of airports connected to  $i$  via nonstop flights from our first stage specification. The coefficient of interest  $\beta_1$  thus measures the impact of an additional airport connection, or increased connectivity, on the number of publications at a given airport at a given year.

**Table F2.** Nonstop flights and connectivity increase the number of collaborations and citations at the airport level.

|                                     | Citations                       |             |             | Publications                 |             |             |
|-------------------------------------|---------------------------------|-------------|-------------|------------------------------|-------------|-------------|
|                                     | (1)<br>Total<br>(2000-<br>2015) | (2)<br>2004 | (3)<br>2014 | (4)<br>Total (2000-<br>2015) | (5)<br>2004 | (6)<br>2014 |
| Connected<br>Airports, 2015         | 0.126***                        | 0.099**     | 0.062***    | 0.105***                     | 0.071**     | 0.057***    |
|                                     | (0.046)                         | (0.040)     | (0.020)     | (0.036)                      | (0.028)     | (0.019)     |
| Total<br>airportsnear6k             | 0.160                           | 0.113       | 0.060       | 0.114                        | 0.064       | 0.057       |
|                                     | (0.109)                         | (0.093)     | (0.046)     | (0.085)                      | (0.063)     | (0.042)     |
| Distance from<br>Equator            | -0.000                          | -0.000      | -0.000      | -0.000                       | -0.000      | -0.000      |
|                                     | (0.001)                         | (0.000)     | (0.000)     | (0.000)                      | (0.000)     | (0.000)     |
| Time zone<br>difference<br>from GMT | -0.282                          | -0.196      | -0.061      | -0.198                       | -0.107      | -0.072      |
|                                     | (0.363)                         | (0.307)     | (0.171)     | (0.282)                      | (0.204)     | (0.152)     |
| Observations                        | 4956                            | 4956        | 4956        | 4956                         | 4956        | 4956        |

*Note:* Standard errors in parentheses, clustered at the country level. All specifications include region fixed effects. Both dependent variables are asinh-transformed.

\*  $p < 0.10$ , \*\*  $p < 0.05$ , \*\*\*  $p < 0.01$

Column 1 shows that an additional connected airport in 2015 leads to a 12.6% increase in the total number of citations to patents near that airport. Columns 2 and 3 show that this effect is positive for 2004 and 2014, but decreasing, possibly because of insufficient time for citations to be realized. Similarly, Column 4 shows that an additional connected airport in 2015 increases the number of publications at that airport by about 10.5%, and that this effect is positive for 2004 and 2014.

**Table F3.** Instrumental variable analysis to gauge flight effects at the airport level, firms versus academic institutions.

|                | Firms               |                     | Academic Institutions |                     |
|----------------|---------------------|---------------------|-----------------------|---------------------|
|                | (1)<br>Citations    | (2)<br>Publications | (3)<br>Citations      | (4)<br>Publications |
| conn2015       | 0.124***<br>(0.046) | 0.105***<br>(0.036) | 0.085***<br>(0.027)   | 0.061***<br>(0.019) |
| airportsnear6k | 0.163<br>(0.109)    | 0.115<br>(0.084)    | 0.047<br>(0.065)      | 0.043<br>(0.048)    |
| dist_equator   | -0.000<br>(0.001)   | -0.000<br>(0.000)   | -0.000<br>(0.000)     | -0.000<br>(0.000)   |
| gmt_timediff   | -0.287<br>(0.362)   | -0.197<br>(0.281)   | -0.121<br>(0.217)     | -0.091<br>(0.153)   |
| Observations   | 4956                | 4956                | 4956                  | 4956                |

*Note:* Standard errors in parentheses, clustered at the country level. All specifications include region fixed effects. All dependent variables are asinh-transformed.

\*  $p < 0.10$ , \*\*  $p < 0.05$ , \*\*\*  $p < 0.01$

An additional connected airport has positive effect on citations and publications. Furthermore, Columns 1-2 in the table above suggest that the effect is greater for patents by firms than for patents by academics. Note that we have instrumented for the number of connected airports in 2015 to more easily interpret the coefficient sizes. The same results hold when using eigenvector centrality instead of the number of connected airports.

Overall, results from section F1 suggest that flight connections between pairs are not changing the composition of citations / collaborations, but are increasing the pie overall.

## F2. Forging new collaborations or strengthening existing collaborations?

Our main empirical strategy has no pre-post testing. Therefore, it is difficult to test whether there is a “change” in the composition of teams. Instead, we use an instrumental variable approach at the airport level to test whether additional flights affect the extensive margin (as measured by the number of collaborators) or the intensive margin (as measured by the duration of collaborations).

The main idea is that if flights have an effect on the extensive margin, we should see flights increase the *breadth* of collaborators, while the intensive margin would lead to increased *duration* of collaborations. First, we test whether more nonstop flights lead to more unique collaborators and/or longer collaborations between collaborators.

For each inventor in our sample, we find the unique number of collaborators. Then, for each inventor-collaborator pair, we find the collaboration duration (time difference in years between first and last collaboration). Then, for each airport in our sample, we take the average and maximum of 1) the number of collaborators, and 2) the average collaboration duration for each inventor. Thus, for each airport, we obtain 1) the average number of collaborators, 2) the average duration of collaborations, 3) the maximum number of collaborators, and 4) the maximum duration of collaborations across all inventors within a 50-mile radius of the airport.

We consider inverse hyperbolic sine transformed outcomes in the table below.

**Table F4.** Intensive versus extensive margins: mean and maximum number of collaborations and collaboration duration.

|                | (1)<br>Mean #<br>Collaborators | (2)<br>Mean Collab.<br>Duration | (3)<br>Max #<br>Collaborators | (4)<br>Max Collab.<br>Duration |
|----------------|--------------------------------|---------------------------------|-------------------------------|--------------------------------|
| conn2015       | 0.018***<br>(0.007)            | 0.014**<br>(0.006)              | 0.089***<br>(0.026)           | 0.062***<br>(0.020)            |
| airportsnear6k | 0.032*<br>(0.018)              | 0.013<br>(0.016)                | 0.104<br>(0.069)              | 0.064<br>(0.050)               |
| dist_equator   | -0.000<br>(0.000)              | -0.000<br>(0.000)               | -0.000<br>(0.000)             | -0.000<br>(0.000)              |
| gmt_timediff   | -0.053<br>(0.054)              | -0.032<br>(0.047)               | -0.135<br>(0.207)             | -0.109<br>(0.145)              |
| Observations   | 4956                           | 4956                            | 4956                          | 4956                           |

*Note:* Standard errors in parentheses, clustered at the country level. All specifications include region fixed effects. Conn2015 measures the number of airports to which airport *i* is connected to in 2015. Airportsnear6k counts the total number of airports within 6000 miles of airport *i*. dist\_equator measures the distance from airport *i* to the equator. Gmt\_timediff measures the difference between airport *i*'s time zone and GMT. Mean # collaborators measures the mean number of collaborators for all inventors within 50 miles of airport *i*. All dependent variables are asinh-transformed.

\*  $p < 0.10$ , \*\*  $p < 0.05$ , \*\*\*  $p < 0.01$

Columns 1 and 2 show the average number of collaborators and collaboration duration, while Columns 3 and 4 show the maximum number of collaborations and durations. We see that nonstop flights increase innovation in both the extensive and intensive margins, facilitating both meeting new

collaborators as well as intensifying existing ones. Qualitatively, the coefficient magnitudes point to the extensive margin being larger, suggesting flights allow inventors to meet more new inventors, but the coefficients are not statistically significant from each other. Interestingly, the coefficient sizes are larger for Columns 3 and 4, suggesting that the effect of nonstop flights is greater for more productive inventors.

We also use the raw number of collaborations and duration without transforming in the table below.

**Table F5.** Intensive and extensive margins: mean and maximum number of collaborations / collaboration duration (raw value, not asinh-transformed).

|                | (1)<br>Mean #<br>Collaborators | (2)<br>Mean Collab.<br>Duration | (3)<br>Max #<br>Collaborators | (4)<br>Max Collab.<br>Duration |
|----------------|--------------------------------|---------------------------------|-------------------------------|--------------------------------|
| conn2015       | 0.027**<br>(0.010)             | 0.014<br>(0.009)                | 5.435**<br>(2.374)            | 0.487***<br>(0.167)            |
| airportsnear6k | 0.041<br>(0.027)               | 0.011<br>(0.022)                | 11.444*<br>(6.332)            | 0.378<br>(0.403)               |
| dist_equator   | -0.000<br>(0.000)              | -0.000<br>(0.000)               | -0.020<br>(0.028)             | -0.001<br>(0.002)              |
| gmt_timediff   | -0.072<br>(0.081)              | -0.048<br>(0.066)               | -2.481<br>(16.300)            | -0.829<br>(1.254)              |
| Observations   | 4956                           | 4956                            | 4956                          | 4956                           |

*Note:* Standard errors in parentheses, clustered at the country level. All specification include region fixed effects. Conn2015 measures the number of airports to which airport I is connected to in 2015. Airportsnear6k counts the total number of airports within 6000 miles of airport i. dist\_equator measures the distance from airport I to the equator. Gmt\_timediff measures the difference between airport I's time zone and GMT. Mean # collaborators measures the mean number of collaborators for all inventors within 50 miles of airport i.  
\*  $p < 0.10$ , \*\*  $p < 0.05$ , \*\*\*  $p < 0.01$

## Appendix G. Pecuniary Cost and Travel Time

**Table G1.** Duration matters more for airports further apart.

|                  | Under 6000            |                    | Over 6000             |                       |
|------------------|-----------------------|--------------------|-----------------------|-----------------------|
|                  | (1)<br>Collaborations | (2)<br>Citations   | (3)<br>Collaborations | (4)<br>Citations      |
| Duration (asinh) | -0.580**<br>(0.278)   | -0.498*<br>(0.291) | -1.048**<br>(0.404)   | -1.238***<br>(0.390)  |
| Price (asinh)    | -0.291<br>(0.245)     | -0.436*<br>(0.242) | 0.142<br>(0.240)      | 0.044<br>(0.244)      |
| Distance (asinh) | -0.792<br>(1.046)     | -1.835<br>(1.715)  | 3.128***<br>(0.742)   | 4.793***<br>(0.819)   |
| Constant         | 11.864<br>(10.302)    | 22.099<br>(16.049) | -24.567***<br>(6.920) | -37.367***<br>(7.566) |
| Observations     | 651                   | 651                | 572                   | 572                   |
| R <sup>2</sup>   | 0.592                 | 0.700              | 0.637                 | 0.831                 |

*Note:* This table tests the two potential mechanisms (flight duration and flight price) for location pairs with longer versus shorter flight paths. Standard errors are in parentheses, clustered at the country-country level. Both dependent variables are asinh-transformed. \*  $p < 0.1$ , \*\*  $p < 0.05$ , \*\*\*  $p < 0.01$ .

**Table G2.** Duration matters more for international flights.

|                  | Domestic Flight       |                    | International Flight  |                       |
|------------------|-----------------------|--------------------|-----------------------|-----------------------|
|                  | (1)<br>Collaborations | (2)<br>Citations   | (3)<br>Collaborations | (4)<br>Citations      |
| Duration (asinh) | -0.052<br>(0.385)     | 0.067<br>(0.188)   | -0.899***<br>(0.249)  | -0.870***<br>(0.244)  |
| Price (asinh)    | -0.704<br>(1.261)     | -0.747<br>(1.003)  | -0.159<br>(0.116)     | -0.243**<br>(0.113)   |
| Distance (asinh) | -1.264<br>(0.662)     | -2.646*<br>(1.171) | 1.476***<br>(0.508)   | 2.743***<br>(0.591)   |
| Constant         | 18.272<br>(13.557)    | 31.045<br>(16.646) | -7.745<br>(4.824)     | -17.737***<br>(5.685) |
| Observations     | 219                   | 219                | 1028                  | 1028                  |
| R <sup>2</sup>   | 0.283                 | 0.424              | 0.684                 | 0.854                 |

*Note:* This table tests two potential mechanisms (flight duration and flight price) for location pairs with domestic versus international flights. Standard errors are in parentheses, clustered at the country pair level. All specifications include country pair fixed effects. Both dependent variables are asinh-transformed. \*  $p < 0.1$ , \*\*  $p < 0.05$ , \*\*\*  $p < 0.01$ .

## Appendix References

- Abadie A, Athey S, Imbens GW, Wooldridge J (2017) *When should you adjust standard errors for clustering?* (National Bureau of Economic Research).
- Angrist JD, Pischke JS (2008) *Mostly harmless econometrics: An empiricist's companion* (Princeton university press).
- Calonico S, Cattaneo MD, Farrell MH (2020) Optimal bandwidth choice for robust bias-corrected inference in regression discontinuity designs. *The Econometrics Journal* 23(2):192–210.
- Furman JL, Hayes R (2004) Catching up or standing still?: National innovative productivity among ‘follower’ countries, 1978–1999. *Research policy* 33(9):1329–1354.
- Imbens G, Kalyanaraman K (2012) Optimal Bandwidth Choice for the Regression Discontinuity Estimator. *Rev Econ Stud* 79(3):933–959.
- Imbens GW, Lemieux T (2008) Regression discontinuity designs: A guide to practice. *Journal of econometrics* 142(2):615–635.
- MacKinnon JG, Magee L (1990) Transforming the dependent variable in regression models. *International Economic Review*:315–339.
- Niwattanakul S, Singthongchai J, Naenudorn E, Wanapu S (2013) Using of Jaccard coefficient for keywords similarity. *Proceedings of the international multiconference of engineers and computer scientists*. 380–384.
